1 **Ablation of colonic epithelial Reg4+ support cells induces Notch-independent**  
2 **regeneration and mesenchymal remodeling.**

3 Timothy W Wheeler<sup>1</sup>, Anne E Zemper<sup>1</sup>

4 1 Department of Biology, Institute of Molecular Biology, University of Oregon, Eugene, OR 97403

5 **Graphical Abstract**

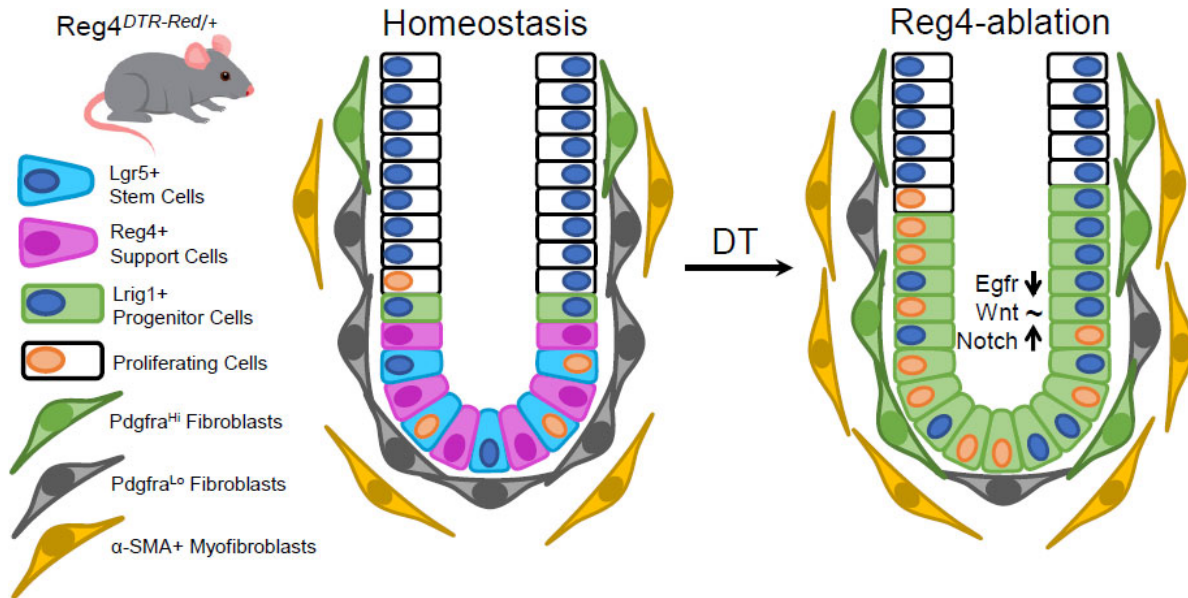

6

7 **Abstract**

8 The colonic epithelium harbors a complex network of adult stem cells that integrate signals from  
9 many supporting cells to assist in their decision making. In this study, we ablate an epithelial  
10 secretory support cell population characterized by Reg4 expression, to investigate the systemic  
11 impact on stemness-related cell signaling pathways. Ablation of these cells results in a  
12 hyperproliferative state as well as paradoxical activation of Notch signaling, with the proliferative  
13 effect continuing even during Notch inhibition. Reg4+ cell ablation also causes an unexpected  
14 remodeling of the mesenchyme. We observe increased presence of Pdgfra-high fibroblasts and  
15 an expanded network of smooth muscle myofibroblasts, suggesting that Reg4-ablation  
16 reorganizes signaling between epithelium and mesenchyme. These changes occur in the

17 absence of any significant immunological inflammatory response. Our data demonstrate that  
18 Reg4+ cells are critical directors of homeostatic epithelial-mesenchymal signaling. Further, this  
19 ablation model is an *in vivo* system for probing cell-cell interactions in the colonic stem cell niche.

## 20 **Introduction**

21 Epithelial stem cells are present across many genera in biology (Chacón-Martínez et al., 2018)  
22 and generally, stem cells act as population drivers - they give rise to more differentiated daughter  
23 cells which are responsible for the day-to-day duties of a given tissue. These cells often integrate  
24 extrinsic cues from both adjacent epithelial cells and their non-epithelial microenvironment to  
25 make decisions. The cells immediately surrounding the stem cell comprise its “niche”, and the  
26 stem cells exchange information with these cells throughout their life span (Chacón-Martínez et  
27 al., 2018; Meran et al., 2017). For tissues that constantly regenerate like the skin (Chacón-  
28 Martínez et al., 2018), blood (Wei & Frenette, 2018) and gastrointestinal epithelium (Chacón-  
29 Martínez et al., 2018; Meran et al., 2017), these cellular decisions are critical to maintaining the  
30 life of the tissue throughout an organism’s lifespan. Cells within these tissues have evolved  
31 mechanisms for handling changes within their environment and are generally thought of as  
32 dynamically-regulated and highly adaptable. Environmental changes can come in many forms.  
33 For the skin, it may be a burn or a scrape, resolved by epidermal stem cells dividing to generate  
34 additional skin cells to cover the wound, in combination with an inflammatory response that  
35 mitigates infection (Chen et al., 2018). But how are these injuries sensed? Why do some  
36 environmental changes elicit stem cell-based responses that differ from others? In short, what  
37 drives this adaptation to promote tissue maintenance over tissue death? To answer these  
38 questions, it’s helpful to take a reductionist approach by eliminating individual signals or cell  
39 populations, and then measuring the response in the stem cells. This is the approach we have  
40 taken to understanding colon adaptability.

41 In the colon, the cellular structure is critical to its function. The columnar epithelium is arranged  
42 as a single layer, acting as a barrier to intestinal contents, and is composed of millions of crypts  
43 (Potten, 1998). These crypts are U-shaped invaginations that harbor the stem cells, and their  
44 niche, at the crypt-base (Meran et al., 2017). The stem cells are highly proliferative, dividing once  
45 per day in mice and in humans, to generate a continual supply of differentiated daughter cells that  
46 are responsible for colon function. These stem cells have a unique molecular marker, Leucine  
47 Rich Repeat Containing G Protein-Coupled Receptor 5 (Lgr5), that distinguishes them from the  
48 other cells in surrounding epithelium (Barker et al., 2007). The cells that live on either side of  
49 these stem cells are differentiated cells and they also express a unique marker called  
50 Regenerating Islet-Derived Protein 4 (Reg4). Reg4<sup>+</sup> cells express a myriad of ligands that bind  
51 to the stem cells to instruct a number of cellular functions, including regulation of proliferation and  
52 restricting differentiation. Recently, it was shown that ablation of these Reg4<sup>+</sup> cells led to loss of  
53 Lgr5 expression in the remaining cells in the niche, and instead of collapsing, the crypts retained  
54 their unique structure and the cells within them continued to proliferate (Sasaki et al., 2016). The  
55 authors posited the cells remaining in the crypt may differentiate in response to ablation of Reg4<sup>+</sup>  
56 cells, however this suggestion is at odds with the proliferative response they observed. Our study  
57 investigates this unexpected proliferative response, and we show that in the face of acute  
58 disruption the stem niche can immediately adapt to persist and recover. We show this is  
59 accomplished by a paradoxical shift in cellular signaling programs in the remaining cells of the  
60 crypt, accompanied by the reorganization of critical mesenchymal cell populations.

## 61 **Results**

### 62 **Reg4 ablation induces transient hyperproliferation**

63 Ablation of Reg4<sup>+</sup> cells was previously shown to induce a loss of Lgr5<sup>+</sup> stem cells without the  
64 loss of crypt-based proliferation (Sasaki et al., 2016). As stem cell loss generally induces a lack  
65 of proliferation and eventual organ atrophy, we first sought to more fully resolve this unexpected

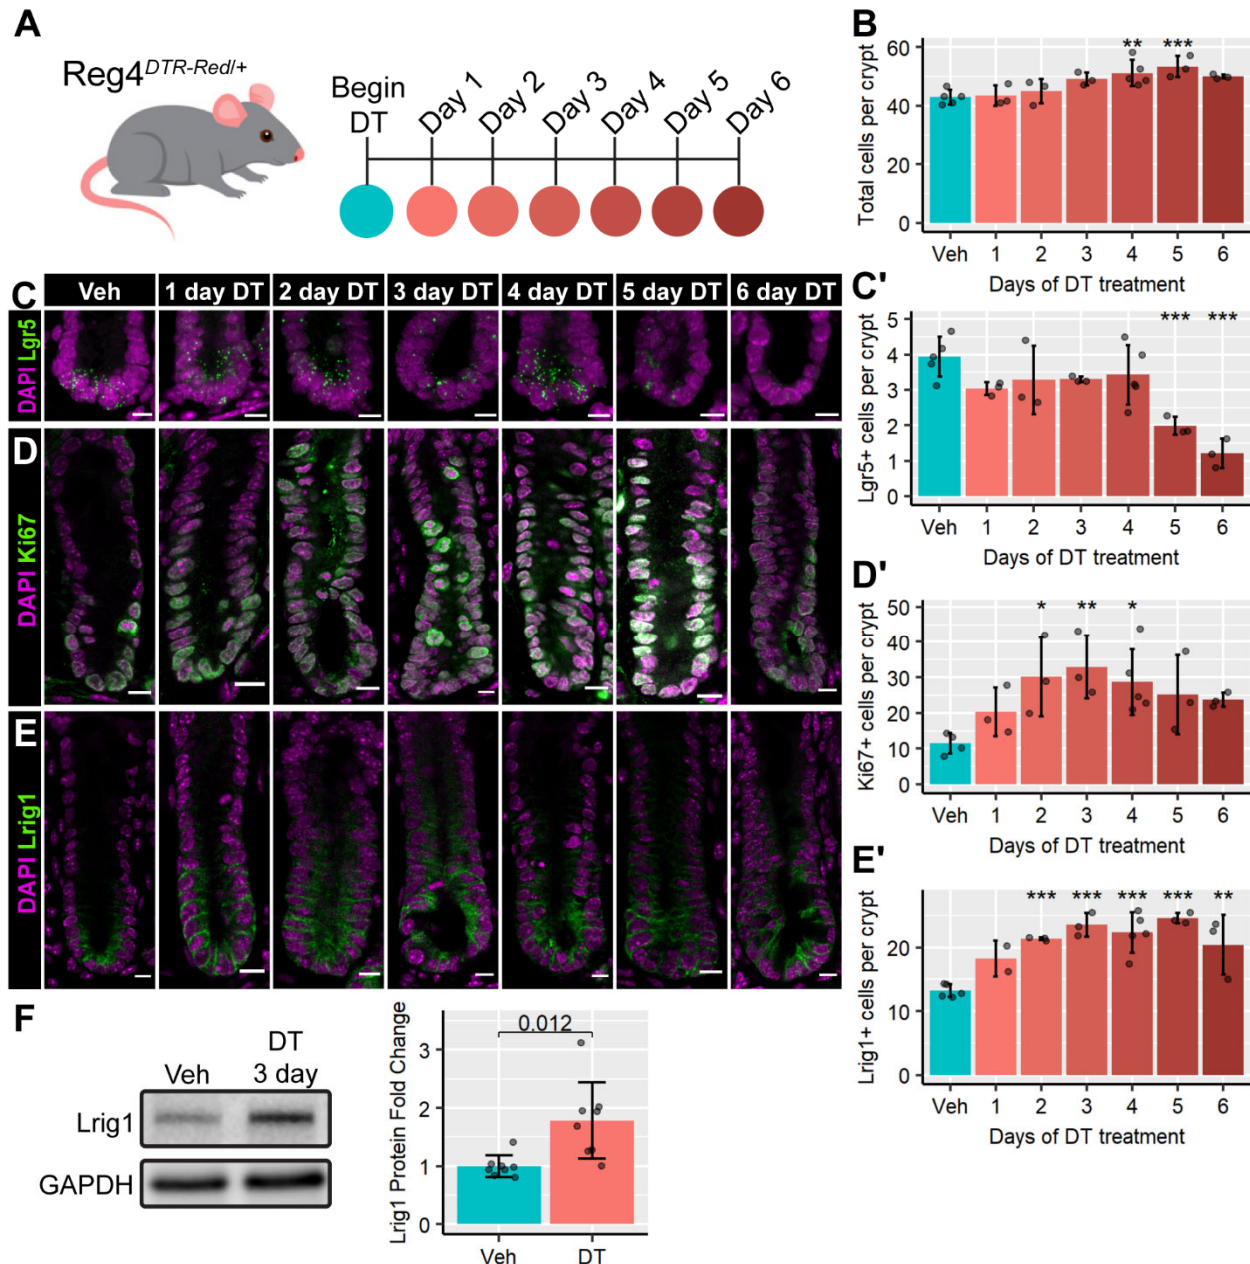

**Figure 1. Reg4-ablation induces transient hyperproliferation.** (A) Overview of Reg4-ablation time course, with diphtheria toxin (DT) or Vehicle (Veh; PBS) administered via intraperitoneal injection daily. Mice were sacrificed 24 hours after last injection, and colonic tissue collected 1-6 days after the start of injections. Vehicle injections were administered for 4 days. Diagram colors correspond to graph time points. (B) Total cells per well-formed crypt cross-section were measured across all stains (100-200 crypts per mouse). (C) *In-situ* hybridization for stem cell marker *Lgr5* (green) indicates a significant decrease at 5-6 days of DT treatment, quantified in C'. Images show maximum intensity projection of 5- $\mu$ m z-stack. (D) Immunofluorescence for proliferation marker Ki67 (green) indicates a significant increase in proliferation increases significantly in response to Reg4-ablation, quantified in D'. (E) Immunofluorescence for progenitor marker Lrig1 (green) indicates a significantly expanded progenitor compartment during Reg4-ablation, quantified in E'. Nuclei are stained with DAPI (magenta). Graphs represent mean  $\pm$  sd of mouse means, with individual mice represented as points. 15-25 crypts were measured per mouse for immunofluorescence and *in-situ* hybridization (n = 2-5 mice/group). Significance is calculated by nested Tukey test using crypts as random effect. *p*-values indicated: \* < 0.05, \*\* < 0.01, \*\*\* < 0.001. All scale bars indicate 10  $\mu$ m. (F) Western blot of purified mucosal protein indicates a 1.5-fold increase in Lrig1 in 3-day DT treated tissue compared to vehicle (n = 8 mice/group). GAPDH is used as a loading control. Significance indicated by *p*-value on graph, calculated by two-tailed unpaired Student's t-test.



66 impact of Reg4-ablation on colon stem cells and proliferation throughout the course of this 6-day  
67 time period. We used *Reg4<sup>dsRed-DTR/+</sup>* mice to ablate Reg4+ cells via daily diphtheria toxin (DT)  
68 injections as previously described (Sasaki et al., 2016), examining daily time points in a 6-day  
69 time course (Figure 1A). Control mice were injected with phosphate buffered saline (PBS) vehicle.  
70 As with the previous study, we observe the loss of Lgr5 expression by the 6th day of DT-driven  
71 Reg4+ cell ablation (Figure 1C, 1C'). We also observe an increase in total cell number per crypt,  
72 (Figure 1B), with the average cells per crypt cross-section increasing from 43 cells/crypt in vehicle  
73 to an average maximum of 53 at day 5 of Reg4-ablation. The driver of hyperplasia, cellular  
74 proliferation, increases soon after the start of time course (Figure 1D), with a significant increase  
75 in proliferation between 2-4 days of daily DT injections. The average maximum proliferation we  
76 observe is 33 Ki67+ cells/crypt at the 3-day timepoint, compared to an average of 11 Ki67+  
77 cells/crypt in vehicle-injected controls (Figure 1D'). These data define a specific time course of  
78 hyperproliferation in response to ablation of Reg4+ cells within the first week of ablation.

### 79 **Reg4 ablation expands a hyperproliferative progenitor cell pool**

80 We sought the source of this transient hyperproliferation, by examining the progenitor epithelial  
81 cell pool to determine whether it is transiently expanding in response to Reg4-ablation, or whether  
82 an existing stem cell pool simply increases its proliferation rate. To address whether there were  
83 any dynamic, day-to-day changes to the pool of stem cells, we first examined the expression of  
84 *Lgr5*, which we observe is ultimately lost by day 6. We find no significant changes to the number  
85 of *Lgr5*+ cells until the 5-6 day time point when expression diminished (Figure 1C), which  
86 concurred with the previous study characterizing Reg4+ cells as support cells of the *Lgr5*+ cell  
87 population (Sasaki et al., 2016). We next examined the expression of *Lrig1*, an established stem  
88 and early progenitor cell marker in the colon (Powell et al., 2012). We see a significant increase  
89 in *Lrig1*-expressing (*Lrig1*+) cells and we observe this increased *Lrig1*+ population is maintained  
90 at an average of 1.7-fold above the vehicle-injected animals during this hyperproliferative phase

91 (days 2-4) of Reg4-ablation (Figure 1E). This increase in Lrig1 expression was also verified by  
 92 western blot, where Lrig1 is increased 1.5-fold at 3 days of Reg4-ablation (Figure 1F). To  
 93 determine if Lrig1+ cells were responsible for the hyperproliferation we observe, we labeled

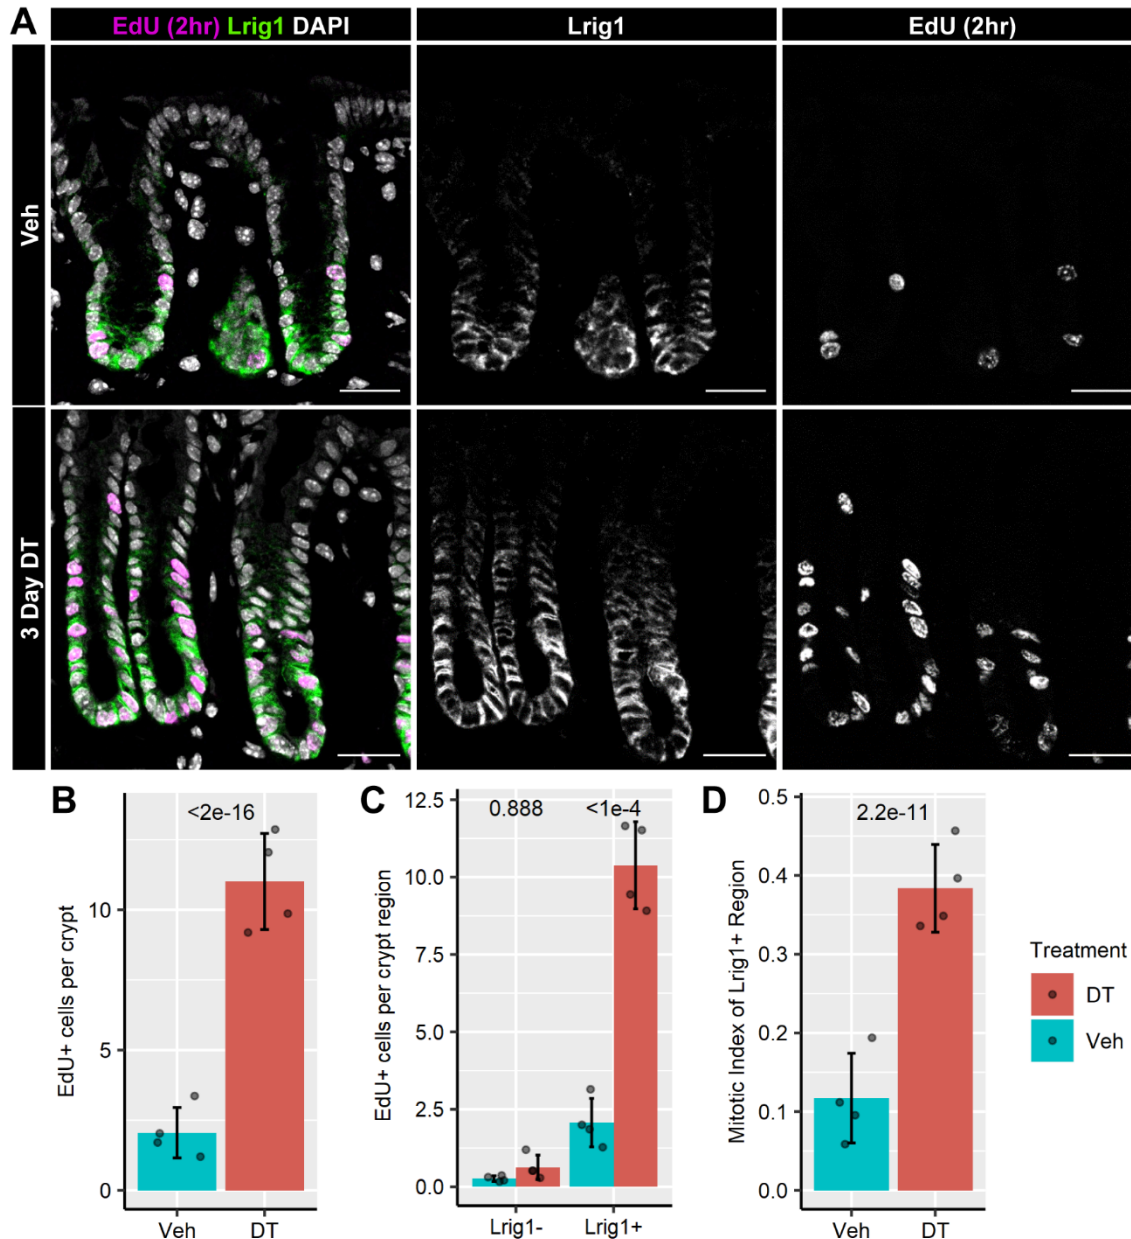

**Figure 2. The hyperproliferation in Reg4-ablation is constrained to an expanded Lrig1-expressing region. (A)** Colonic tissue from Reg4-DTR-Red/+ mice treated with Vehicle (Veh) or diphtheria toxin (DT) daily for 3 days, followed by a 2-hour trace of 5-ethynyl-2'-deoxyuridine (EdU) before mice were sacrificed. In the colored panels, representative images of DT and veh treated tissue were examined for the presence of proliferating cells (EdU labeling, magenta), nuclei by DAPI staining (white), and progenitor compartment by immunofluorescence for Lrig1 (green). Single color stains for Lrig1 and Edu are shown in the white-on-black panels. All scale bars indicate 25  $\mu$ m. **(B)** Comparison of total EdU+ cells per crypt between Veh and DT. **(C)** EdU+ cells per crypt that do not coexpress Lrig1 (Lrig1-) or do coexpress Lrig1 (Lrig1+). **(D)** Comparison of the fraction of total cells that proliferated (mitotic index) between Veh and DT in the Lrig1+ region. n = 4 mice/group, 40-60 crypts per mouse. Graphs represent mean  $\pm$  sd of mouse means, with individual mice represented as points. Significance indicated by p-values on graphs, determined by nested Tukey Test using crypts as random effect.

94 proliferative cells within the crypt using a 2-hour pulse of 5-ethynyl-2'-deoxyuridine (EdU) on day  
95 3 of Reg4-ablation (Figure 2A). These mice have a 5.3-fold increase in total EdU-labeled cells per  
96 crypt (Figure 2B), which agrees with the increase in Ki67 expression we observe (Figure 1D, D').  
97 This expansion of EdU+ cells is concentrated within the Lrig1-expressing region of the crypt  
98 (Figure 2C). We quantified the EdU+;Lrig1+ cells and find the mitotic index of the Lrig1+ region  
99 increased from 0.12 in vehicle to 0.38 in the ablated crypts (Figure 2D). Taken together, our data  
100 suggest that crypt epithelial progenitor proliferation is significantly altered from homeostasis and  
101 the hyperproliferative response to Reg4+ cell ablation occurs in a dedicated pool of Lrig1+ cells.

### 102 **Reg4 ablation does not induce an inflammatory response**

103 As epithelial hyperproliferation and hyperplasia are hallmarks of gut injury and repair (Davies et  
104 al., 2009; Zhang et al., 2012), we wondered whether this phenotype might be due to the stress of  
105 ablation inducing a macrophage-based inflammatory response that is also characteristic of injury  
106 models (Chen et al., 2018). To address this, we probed ablated tissues for expression of the  
107 macrophage marker F4/80, to determine if macrophage infiltration occurred after ablation (Figure  
108 3A), as typical of inflammation after injury (Jones et al., 2018). In comparing vehicle-treated with  
109 DT-treated tissue, we see no significant difference from 1-4 days of treatment, using colons from  
110 mice subjected to dextran sodium sulfate (DSS) treatment as a positive control of macrophage  
111 infiltration (Novak et al., 2016). DSS-treated mice have a 2.3-fold increase in mean intensity of  
112 F4/80 compared to vehicle (Figure 3B). We do observe significant macrophage infiltration at 5-6  
113 days after Reg4-ablation, but not until after the peak of hyperproliferation. Our results show that  
114 the expansion in proliferation in this model occurs in the absence of a classic macrophage-driven  
115 inflammatory response.

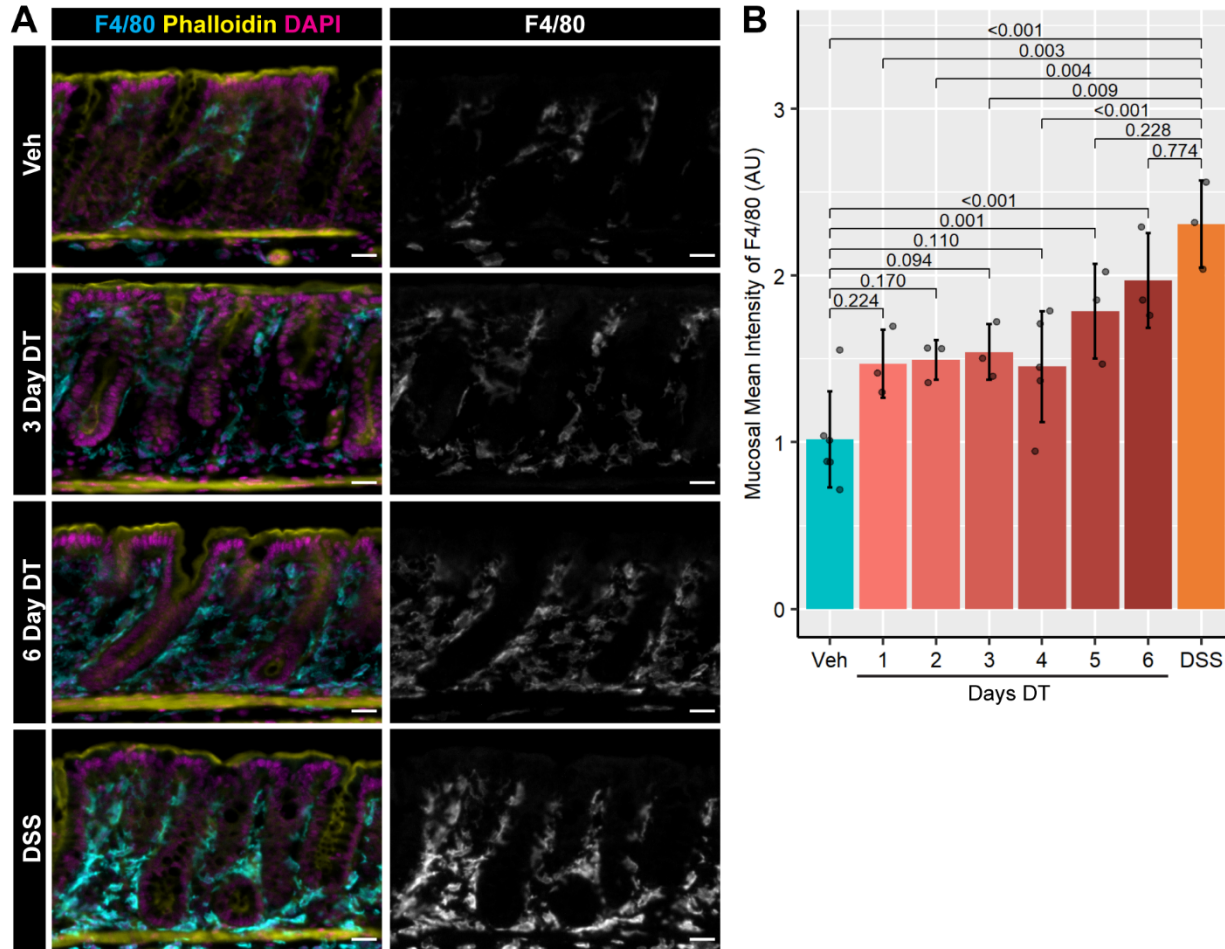

**Figure 3. Macrophage-driven inflammation is not significantly increased in the initial proliferative response to Reg4-ablation.** (A) Colonic tissue from Reg4-DTR/+ mice treated diphtheria toxin (DT), comparing to mice treated with vehicle (Veh) for 4 days as a negative control, and mice treated with 3% dextran sulfate sodium (DSS) in drinking water for 7 days followed by 3 days of recovery as a positive control for elevated macrophage infiltration. Presence of macrophages is indicated by F4/80 immunofluorescence (cyan), epithelial brush border is indicated by phalloidin immunofluorescence (yellow), and nuclei indicated by DAPI staining (magenta). Representative Images shown are from mice treated for 3 and 6 days with DT. Macrophage infiltration for all mice is in the single color (white on black) panels. (B) Quantification of mean intensity of F4/80 staining in total mucosal area across all groups indicates no significant difference between Vehicle and DT-treated mice, contrasted with significantly increased staining in DSS-treated tissue. Graphs represent mean  $\pm$  sd of mouse means, with individual mice represented as points.  $n=3-5$  mice/group, 5-7 images per mouse, with each image capturing  $0.302 \pm 0.060$  mm<sup>2</sup> mucosal area (mean  $\pm$  sd). Significance indicated by  $p$ -values on graphs, determined by nested Tukey Test using images as random effect. All scale bars indicate 25  $\mu$ m.

## 116 Signaling pathways affecting stem cell maintenance are perturbed during Reg4 ablation

117 As epithelial hyperproliferation and hyperplasia are often driven by changes in specific cellular  
 118 signaling programs, we next asked which signaling pathways were specifically perturbed in  
 119 response to Reg4-ablation at the peak of proliferation (day 3). In the colon, there are numerous  
 120 critical cell signaling pathways that guide stem cell decision making, and we prioritized three of  
 121 these pathways in our analyses: Wnt (Nusse & Clevers, 2017), Epidermal growth factor receptor  
 122 (Egfr) (Dubé et al., 2018), and Notch (Pellegrinet et al., 2011).



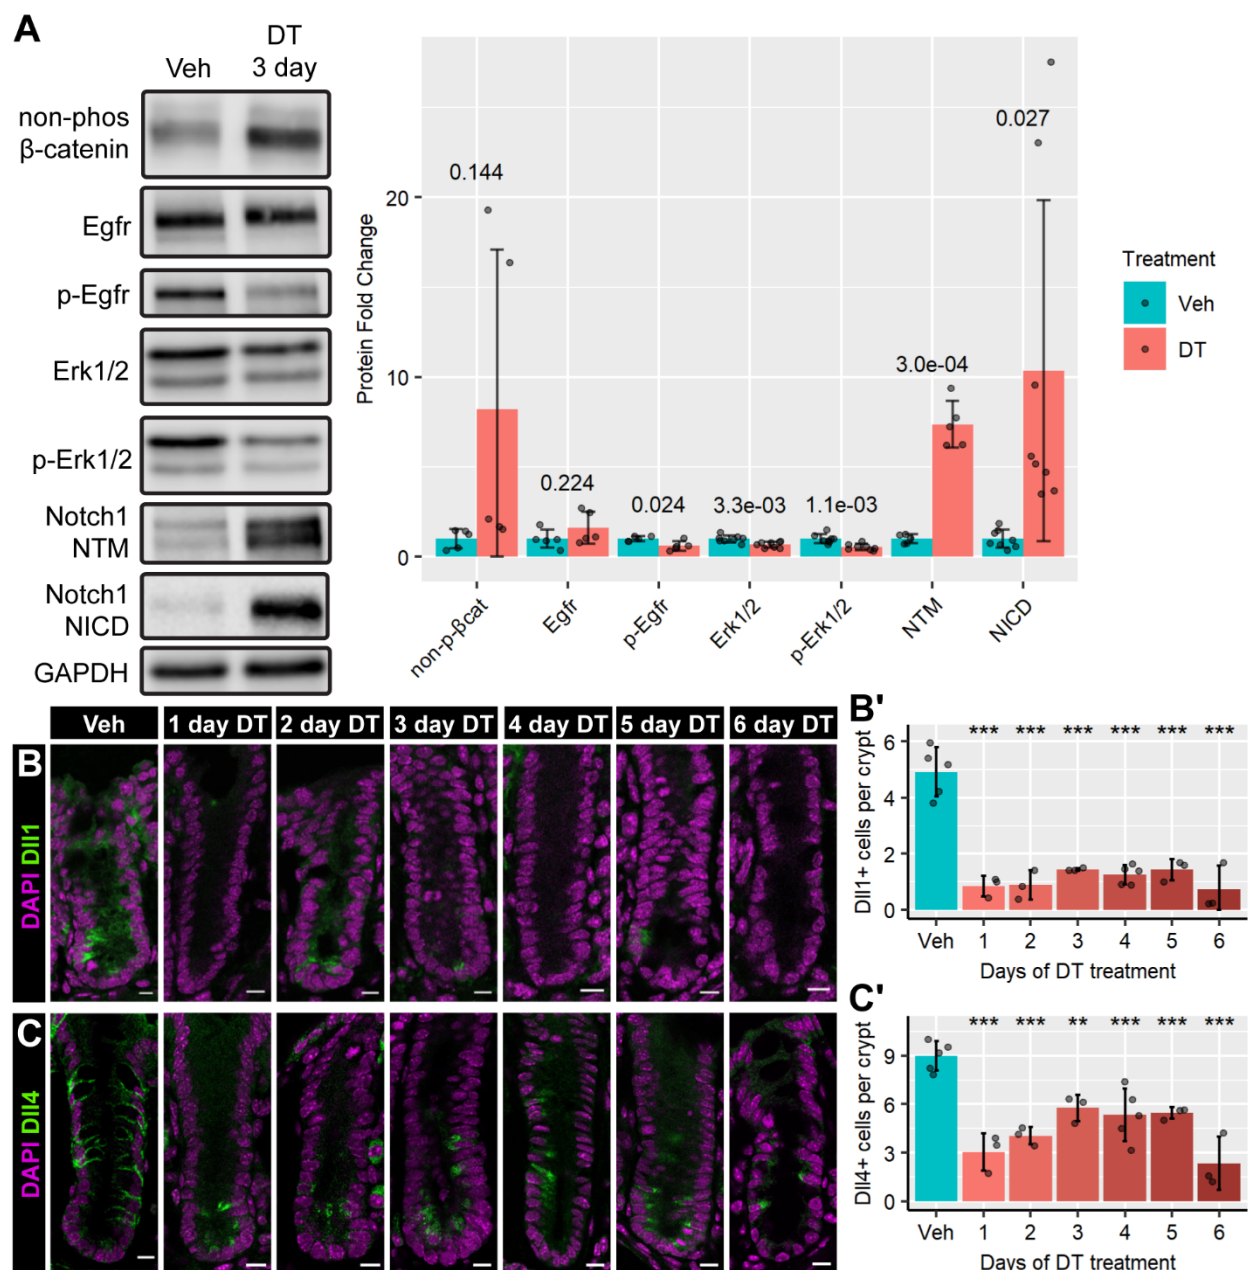

**Figure 4. Reg4-ablation perturbs stemness-associated pathways.** (A) Left panel: Western blot analysis comparing colonic mucosal tissue treated with Vehicle (Veh) or diphtheria toxin (DT) for 3 days. Egfr pathway proteins are detected with Egfr, p-Egfr, Erk1/2 and p-Erk1/2. Wnt signaling is detected by the presence of activated (non-phos)  $\beta$ -catenin, and Notch signaling was assessed by the detection of activated Notch1 (Notch1 transmembrane domain (NTM) and Notch1 intracellular domain (NICD)). Right panel: quantification of Western blot expression data ( $n=5-8$  mice/group). GAPDH is used as a loading control. Significance indicated by  $p$ -values on graph, calculated by two-tailed unpaired Student's  $t$ -test. (B) Immunofluorescence for Notch ligand Dll1 (green) indicates a reduction in Dll1-expressing crypt cells during Reg4-ablation time course, quantified in B'. (C) Immunofluorescence for Notch ligand Dll4 (green) indicates a reduction in Dll4-expressing crypt cells during Reg4-ablation time course, quantified in C'. Nuclear staining indicated by DAPI (magenta). Graphs represent mean  $\pm$  sd of mouse means, with individual mice represented as points. 15-25 crypts were measured per mouse ( $n = 3-5$  mice/group). Significance is calculated by nested Tukey test using crypts as random effect.  $p$ -values indicated: \*  $< 0.05$ , \*\*  $< 0.01$ , \*\*\*  $< 0.001$ . All scale bars indicate 10  $\mu$ m.

123 Wnt signaling is required for crypt-based proliferation (Nusse & Clevers, 2017), so we  
 124 hypothesized that Wnt signaling would be increased immediately after Reg4-ablation due to the  
 125 increase in the progenitor pool. An increase in variance of the Wnt signaling mediator, non-



126 phospho- $\beta$ -catenin (active), is detected in Reg4-ablated colonic tissue cell lysates (Figure 4A),  
127 suggesting perturbed Wnt pathway activation. Despite this, the downstream expression of Wnt  
128 targets remain relatively unchanged at this 3-day timepoint, with no significant changes to *Lgr5*+  
129 cells (Figure 1C), *Lgr5* transcription (Figure S2), or cMyc patterning (Figure S3). As Reg4+  
130 support cells provide Egfr and Notch support to the stem cells (Sasaki et al., 2016), we expected  
131 that these pathways would be significantly downregulated in the epithelium after Reg4-ablation.  
132 We find that Reg4-ablation causes a significant reduction in Egfr pathway activation (Figure 4A).  
133 While total Egfr expression is not significantly changed, phospho-Egfr expression (activated Egfr)  
134 decreases to 0.6-fold from expression levels in vehicle-treated mice. The downstream mediators  
135 of Egfr signaling, Erk1/2, are also significantly less expressed and activated, with Erk1/2  
136 expression reduced to 0.7-fold and phospho-Erk1/2 reduced to 0.5-fold that of vehicle. We probed  
137 for Notch signaling using Notch1 NTM (Notch transmembrane-intracellular fragment) and NICD  
138 (Notch intracellular domain) as indicators of activated Notch (Zhdanovskaya et al., 2021), and find  
139 that Reg4-ablation causes a significant increase in both (Figure 4A). These findings of continued  
140 Notch signaling are especially notable as Reg4-lineage cells are thought to be the primary  
141 expressors of Dll1 and Dll4 (Figure S1,S2), the two primary Notch ligands expressed in the colonic  
142 epithelium (Pellegrinet et al., 2011). In Reg4-ablation, the number of cells expressing Notch  
143 ligands Dll1 and Dll4 are significantly decreased (Figure 4B,C) across all timepoints. Despite the  
144 loss of Notch ligands, we show continued Notch activation based on transcription of the Notch-  
145 activated transcriptional regulator *Hes1* (Figure S2) (Liang et al., 2019). Taken together, our  
146 results suggest signaling pathways affecting stem cell maintenance are perturbed during Reg4  
147 ablation.

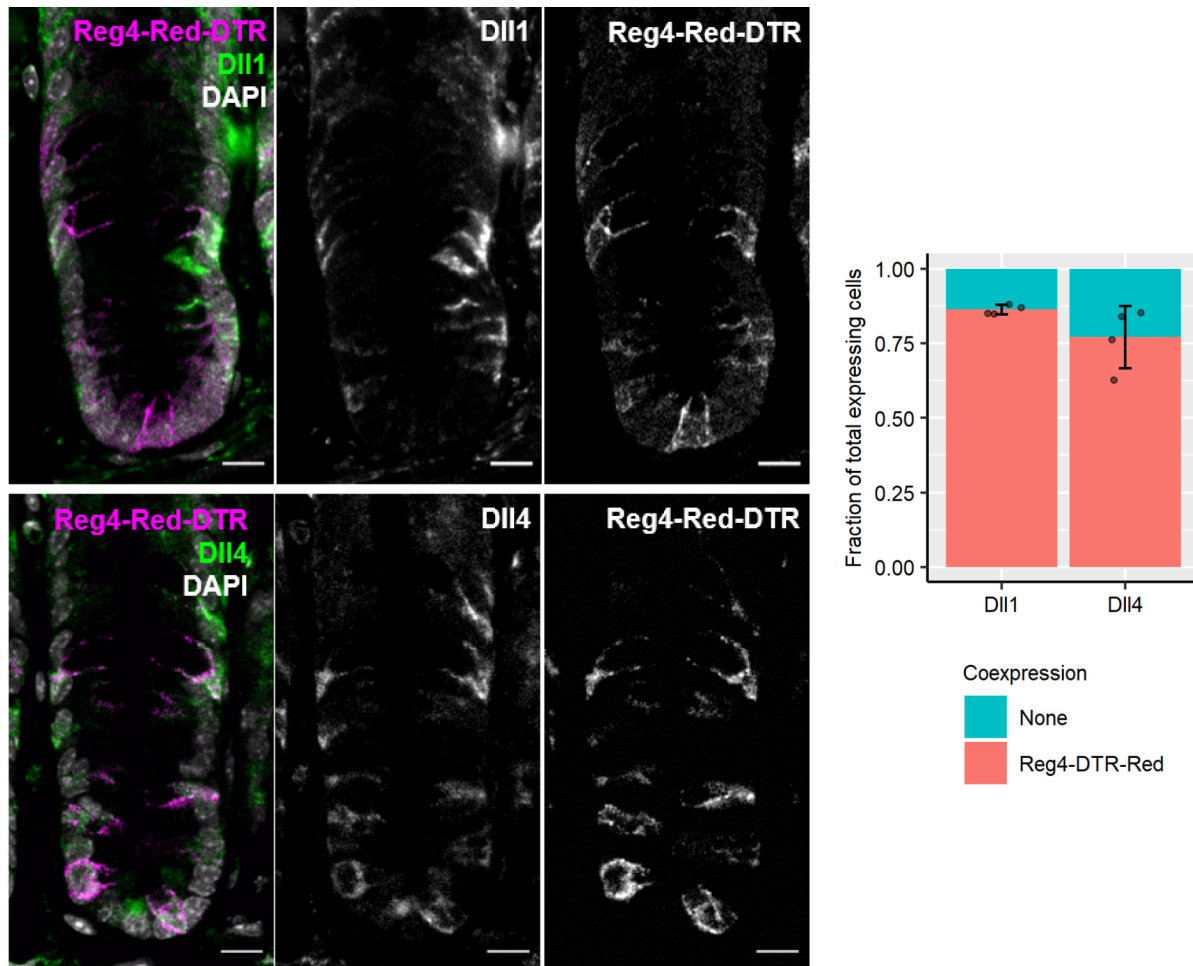

**Supplemental Figure 1. Notch ligand expression in the colonic crypt.** Colonic tissue from Reg4-DTR-Red/+ mice. Notch ligands Dll1 and Dll4 are indicated by immunofluorescence (green), with Reg4-DTR-Red fluorescence indicated (magenta), and nuclei stained with DAPI (gray). Dll1 and Dll4 are primarily expressed by cells from a Reg4+ lineage (Reg4-DTR-Red) in the colonic epithelium, constituting 79% and 76% of total ligand-expressing cells, respectively (n=4 mice). Scale bars indicate 10  $\mu$ m.

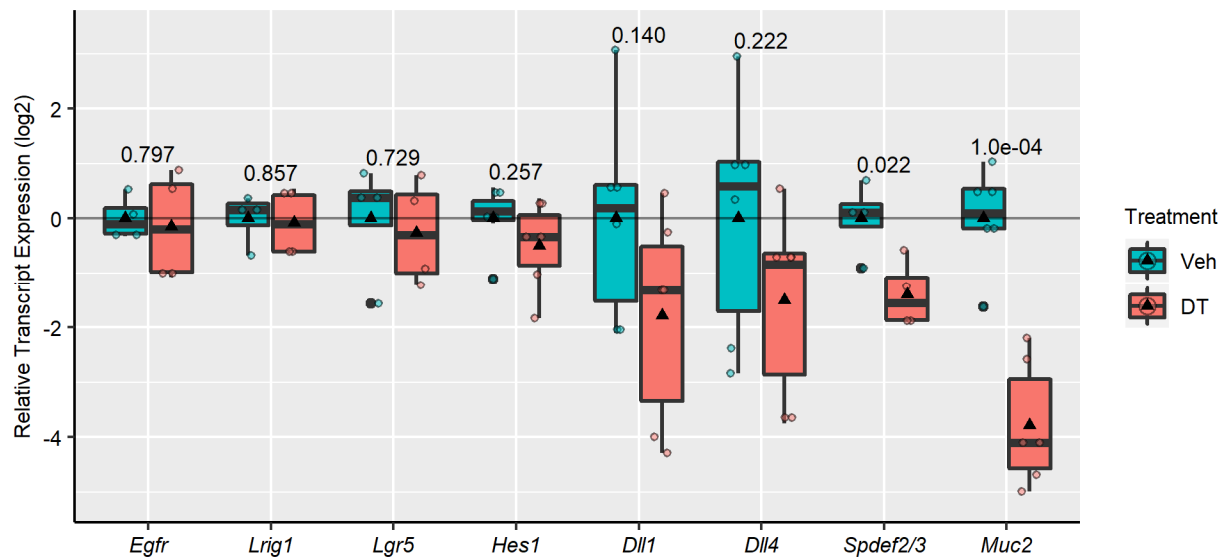

**Supplemental Figure 2. Reg4-ablation causes no significant change to relative transcription of several stemness-associated pathways, but reduces secretory transcription.** qRT-PCR was performed on mucosal purified RNA from colonic tissue from Reg4-DTR-Red mice after 3 days of vehicle (veh) or diphtheria toxin (DT). No significant effect is observed in stemness-linked pathways

(*Egfr*, *Lrig1*, *Lgr5*, *Hes1*), but relative transcription of secretory markers *Spdef2/3* and *Muc2* are significantly reduced. Boxplots represent quartiles with triangles as group mean (n=4-6 mice/group). Statistics taken with two-tailed unpaired Student's t-test, *p*-values indicated on graph.

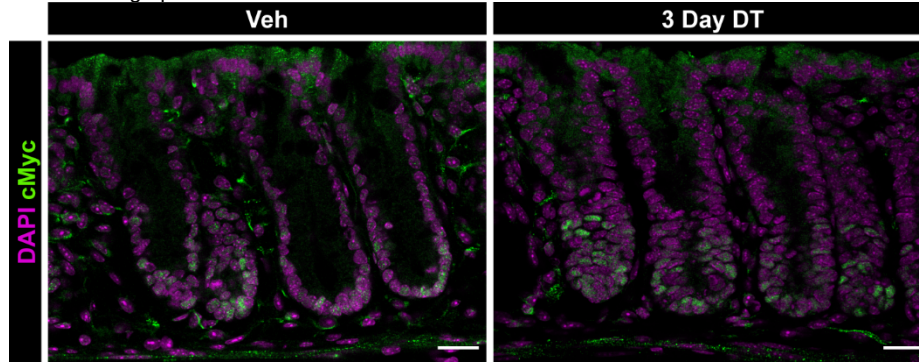

**Supplemental Figure 3. Patterning of cMyc, a downstream Wnt target gene, is not distinctly changed by Reg4-ablation.** Colonic tissue from Reg4-DTR-Red/+ mice treated with vehicle (Veh) or diphtheria toxin (DT) for 3 days. Immunofluorescence of cMyc (green) shows no distinct changes in qualitative expression levels between Veh and DT. Nuclei are indicated by DAPI staining (magenta). Scale bars indicate 25  $\mu$ m.

### 148 Notch signaling is dispensable for the colon's proliferative response to Reg4-ablation

149 Notch regulation is associated with proliferation in the intestinal tract (Bohin et al., 2020; Droy-  
150 Dupré et al., 2012; Pellegrinet et al., 2011), thus our next step was to test whether Notch activation  
151 was necessary for Reg4-ablation induced hyperproliferation. We conducted a dual time course  
152 of Reg4-ablation and Notch inhibition using the pan-Notch inhibitor Dibenazepine (DBZ) (Bohin  
153 et al., 2020; Droy-Dupré et al., 2012) in a staggered time course (Figure 5A). We initiated Reg4-  
154 ablation 24 hours prior to Notch inhibition in order to initiate the proliferative trajectory. At 24 hours  
155 after ablation, we injected DT and DBZ for a subsequent 2 days to allow Notch inhibition to take  
156 effect. Two hours before sacrifice, we administered an EdU pulse to capture the proliferation  
157 occurring at that time. We observe intact gross mucosal and crypt morphology in all experimental  
158 conditions of this time course, although the distribution of visible secretory cells varied greatly by  
159 condition. DBZ-treated crypts show an increased density of secretory cells compared to vehicle,  
160 while DT-treated crypts show reduced secretory cell density irrespective of DBZ treatment (Figure  
161 5B). Activated Notch1 is reduced in DBZ-treated mice, even with DT treatment (Figure 5C). We  
162 find that DBZ treatment alone does not cause a significant change to proliferation or body weight  
163 relative to vehicle (Figure 5D,E), and DT+DBZ treatment does not significantly increase  
164 proliferation relative to DT alone (Figure 5D), though body weight declines significantly faster in

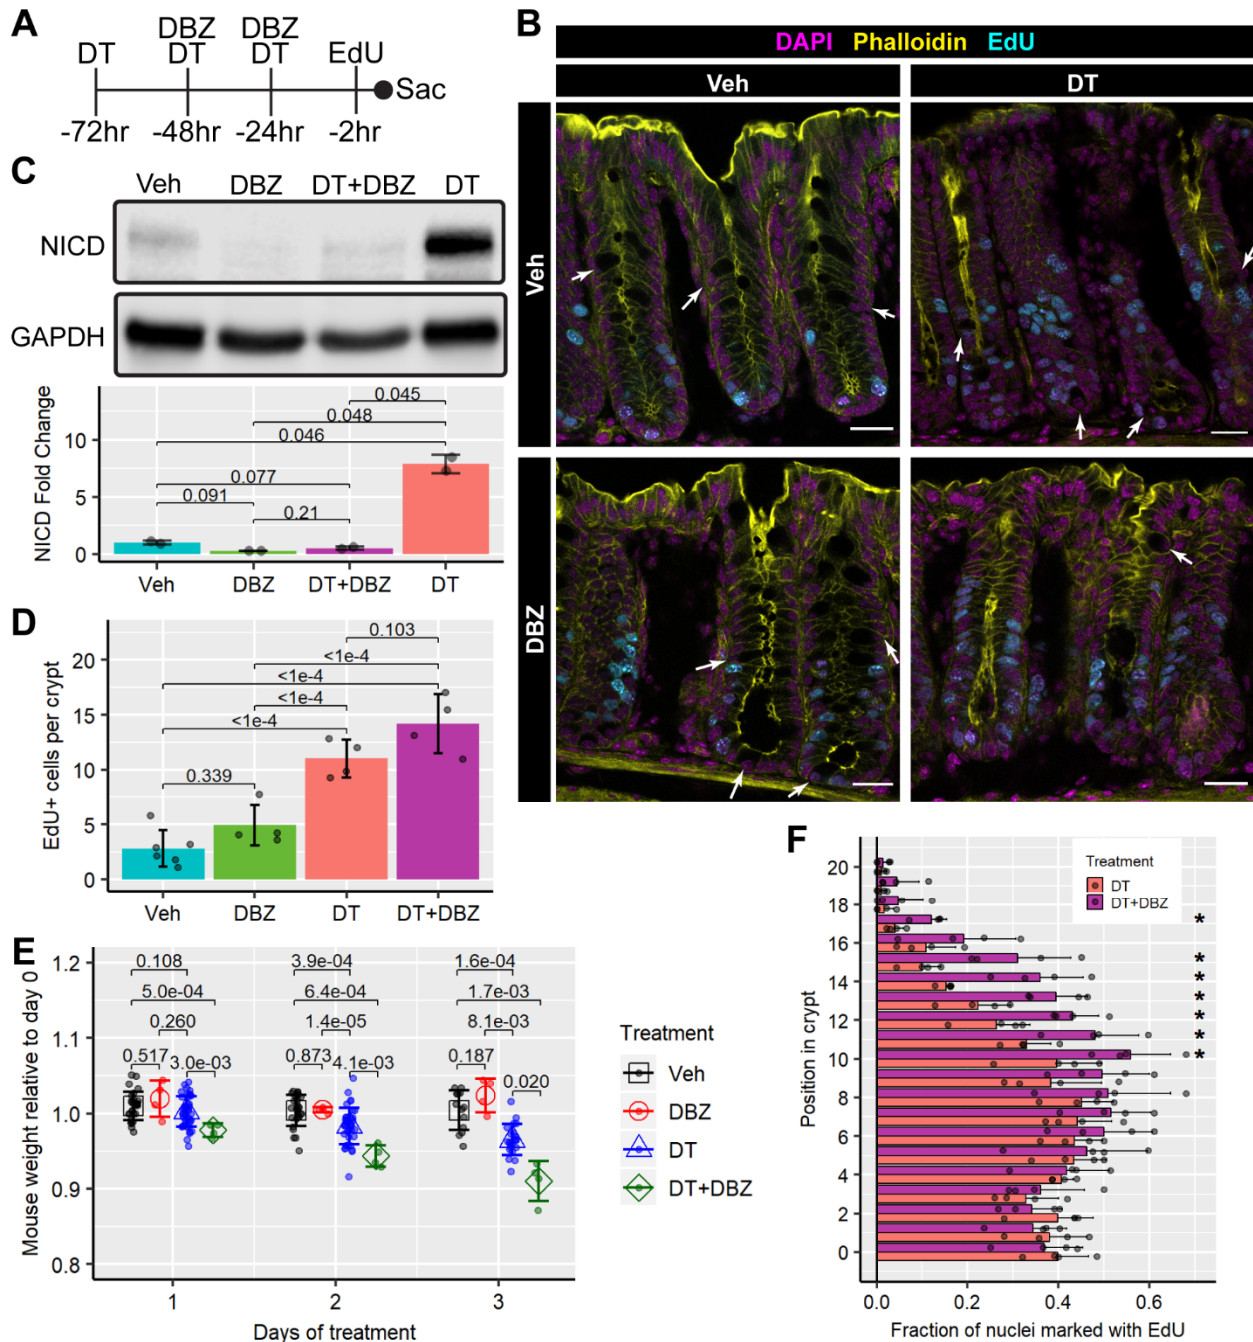

**Figure 5. Notch inhibition does not downregulate hyperproliferation during Reg4-ablation.** (A) Overview of dual Reg4-ablation and Notch inhibition time course to ablate Reg4-DTR-Red-expressing cells with diphtheria toxin (DT) and inhibit Notch signaling with  $\gamma$ -secretase inhibitor XX dibenzazepine (DBZ), followed by a 2-hour trace of 5-ethynyl-2'-deoxyuridine (EdU) before sacrifice. (B) Representative images of colonic tissue with EdU labeling (cyan) to detect proliferation, epithelial brush border by phalloidin immunofluorescence (yellow) and nuclei by DAPI staining (magenta). Arrows indicate examples of obvious secretory cells, visible as more bulbous cells highlighted by phalloidin. (C) Western blot of Notch1 intracellular domain fragment (NICD) shows successful inhibition of Notch by DBZ with and without DT, contrasting with Veh and DT ( $n=2$  mice/group). GAPDH is used as a loading control. Significance indicated by  $p$ -value on graph, calculated by two-tailed unpaired Student's  $t$ -test. (D) Comparison of total proliferation (EdU+) cells per crypt between all conditions, indicating significant differences between the DT treatment axis ( $n=4-6$  mice/group). (E) A graph of mouse weights, relative to starting weight, over the time course. Precipitous weight loss occurs in DT+DBZ treatment compared to Veh and DT treatment alone. Veh and DT group data taken across all mice from study ( $n=4$  (DT, DT+DBZ) 28 (Veh) 43 (DT)). Significance comparisons indicated by  $p$ -values on graph, calculated by two-tailed unpaired Student's  $t$ -test. (F) The fraction of proliferating cells per position relative to crypt base (position 0) is compared between DT and DT+DBZ treatments ( $n=4$  mice/group). The proliferative region is shifted significantly higher on the crypt axis in DT+DBZ treated mice compared to DT. For immunofluorescence, 15-25 crypts measured per mouse. Graphs represent mean  $\pm$  sd of mouse means, with individual mice



represented as points. Significance indicated by  $p$ -values on graphs, determined by nested Tukey Test using crypts as random effect. All scale bars indicate 25  $\mu\text{m}$ .

165 dual treatment compared to all other groups (Figure 5E). Despite the lack of significant change to  
166 total proliferation within crypts following Notch inhibition, we detect a significant shift in the location  
167 of proliferative cells, comparing Reg4-ablated mice with and without Notch inhibition. With respect  
168 to cell position from crypt base (position 0), proliferation shifts further up in crypts treated with  
169 DT+DBZ relative to DT alone (Figure 5D). Together, our results demonstrate Notch signaling is  
170 dispensable for hyperproliferation induced by Reg4-ablation, and inhibition of Notch signaling  
171 after Reg4-ablation causes proliferation to occur higher in the crypts.

## 172 **The mesenchyme is remodeled during Reg4 ablation**

173 Mesenchymal cells that surround the crypts are a critical component of colonic stem cell  
174 regulation (David et al., 2020; Degirmenci et al., 2018; Stzepourginski et al., 2017). We wondered  
175 whether mesenchymal cells, as a niche component, are also affected by Reg4-ablation. Groups  
176 of stem cell- 'supporting' and - 'antagonizing' fibroblasts were recently characterized based on  
177 expression of Platelet-derived growth factor receptor- $\alpha$  (Pdgfra)-low and -high expression,  
178 respectively. Pdgfra-high fibroblasts normally localize to the luminal surface of the colon in  
179 homeostasis (David et al., 2020). Using this marker, we examined patterns of Pdgfra expression  
180 relative to the crypt axis in ablated mice and find Pdgfra-high fibroblasts additionally localize to  
181 the crypt base (Figure 6A). To quantify this, we counted the number of epithelial cells, that are  
182 also adjacent to Pdgfra-high fibroblasts in the bottom half of crypts. Starting at Day 1 after ablation,  
183 the epithelial cells within this lower crypt compartment are 3 times as likely to be adjacent to  
184 Pdgfra-high fibroblasts, compared to vehicle-treated mice (Figure 6B). We also assayed the  
185 tissues for the expression of crypt-adjacent myofibroblasts that express  $\alpha$ -smooth muscle actin  
186 ( $\alpha$ -SMA) (Specia, 2012). We find that purified mucosal protein from Reg4-ablated tissue contains  
187 a 2.2-fold increase in  $\alpha$ -SMA (Figure 6C). Comparing  $\alpha$ -SMA and Pdgfra patterning to each other,  
188 we find that their expression patterns are distinct (Figure 6A). Our data show that mesenchymal



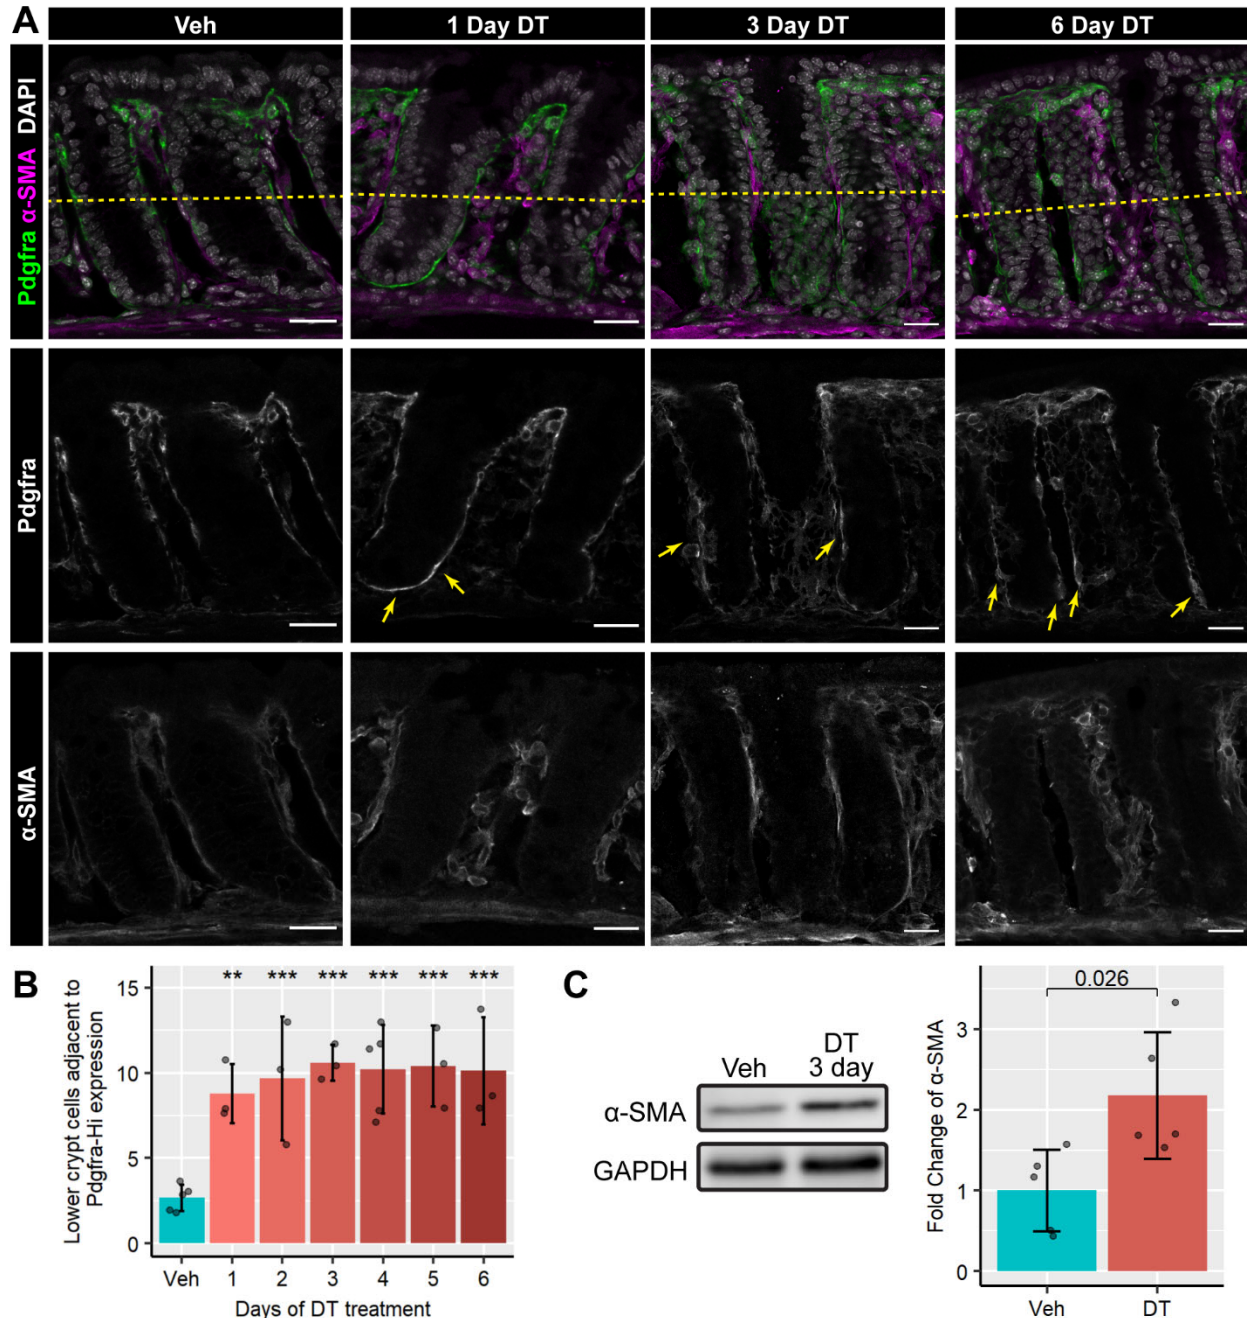

**Figure 6. Reg4-ablation induces mesenchymal remodeling.** (A) Colonic tissue from Reg4-DTR/+ mice treated diphtheria toxin (DT) daily for 1-6 days, compared to mice treated with vehicle (veh) for 4 days. Representative images show stromal fibroblasts indicated by Pdgfra immunofluorescence (green), structural myofibroblasts indicated by  $\alpha$ -SMA immunofluorescence (magenta) and nuclei by DAPI staining (gray). Pdgfra-expressing stromal cells are detected as a distinct set of cells from  $\alpha$ -SMA+ myofibroblasts. White-on-black images for Pdgfra and  $\alpha$ -SMA are shown beneath the colored panel. In the single color panels, Pdgfra high-expressing cells (white) are apparent in DT-treated tissue around the crypt base (marked with arrows).  $\alpha$ -SMA+ myofibroblasts (white) are present throughout the mucosa in all tissues. Scale bars indicate 25  $\mu$ m. (B) Lower-crypt epithelial cells (below dotted line) adjacent to Pdgfra-high stromal cells are significantly increased at all time points of DT treatment. Graphs represent mean  $\pm$  sd of mouse means, with individual mice represented as points. 15-25 crypts were measured per mouse (n = 3-5 mice/group). Significance is calculated by nested Tukey test using crypts as random effect. *p*-values indicated: \* < 0.05, \*\* < 0.01, \*\*\* < 0.001. (C) Representative Western blot analysis of mucosal purified protein shows significant fold increase of  $\alpha$ -SMA in mucosal isolate of 3-day DT treated tissue (quantification in right panel: n=5 mice/group). GAPDH is used as a loading control. Significance indicated by *p*-value on graph, calculated by two-tailed unpaired Student's *t*-test.

189 cell relocation is cell-type dependent after Reg4-ablation. These patterns were consistent across  
190 all timepoints, suggesting that ablation of Reg4+ cells rapidly induces fibroblast remodeling within  
191 the adjacent mesenchyme.

## 192 **Discussion**

193 In our study, we investigated induced ablation of Reg4+ secretory support cells and showed that  
194 in the face of acute disruption, the stem niche can immediately adapt to persist and recover. This  
195 recovery is achieved by induced epithelial hyperproliferation and expansion of an epithelial  
196 progenitor pool, and is accompanied by a paradoxical shift in cellular signaling programs in the  
197 remaining cells of the crypt and the reorganization of critical mesenchymal cell populations.

198 Reg4+ cells in the colon are often compared to the Paneth cells in the small intestine (van Es et  
199 al., 2019), as both are secretory support cells localized to the stem cell niche (Sasaki et al., 2016;  
200 van Es et al., 2019). Previous epithelial DTR ablation models in the gastrointestinal tract do not  
201 report a proliferative response to ablation (Castillo-Azofeifa et al., 2019; Tian et al., 2011; van Es  
202 et al., 2019), suggesting the response we observe is specific to colonic stem cells losing their  
203 epithelial support population. Our data suggests that Reg4+ cells are a distinct support cell  
204 population and have a distinct role that is different from that of the Paneth cell role in the small  
205 intestine. One open question our study does not address is whether the hyperproliferative  
206 response to Reg4-ablation is induced by loss of factors supplied by Reg4+ cells, or the act of  
207 ablating Reg4+ cells itself. Future studies resolving this question would provide useful insights  
208 into both the mechanisms underlying colonic epithelial homeostasis, as well as refine the  
209 applicability of this experimental model. We additionally find that *Spdef2/3* and *Muc2* are  
210 significantly downregulated by Reg4-ablation (Figure S2), and both are key components of the  
211 colon's secretory lineage (Qin et al., 2021). This aids in characterizing the systemic impact of  
212 Reg4-ablation by illuminating the extent to which the broader secretory lineage is perturbed in  
213 this model. This is also contrasted with Paneth cell ablation in the small intestine, in which reserve

214 secretory cells are readily able to compensate for the loss of Paneth cells (van Es et al., 2019);  
215 this notable difference in compensatory mechanism may explain some of the systemic response  
216 we observe and this represents an important area of future research.

217 We find that the Reg4-ablation model produces a transient hyperproliferative response  
218 reminiscent of other colonic injury models (Kiesler et al., 2015; Mizoguchi et al., 2020) yet it does  
219 this in the absence of many of the systemic effects that confound those models and prevent further  
220 analysis of molecular mechanisms that drive colonic homeostasis. By contrast, Reg4-ablated  
221 colons retain gross crypt and organ morphology, with no significant immune response during the  
222 acute period, which often follows tissue injury and obfuscates molecular analysis. Indeed, the  
223 Reg4-ablation model permits the dissection of the mechanisms underlying a proliferative  
224 response to injury, without other confounding factors present in existing models that induce  
225 systemic inflammation.

226 Disruption of the secretory lineage is associated with many other dysfunctions within gut injury  
227 models, and rescue of secretory cells improves the outcome after injury (Shinoda et al., 2010;  
228 Sun et al., 2018). These modes of injury are also linked to mesenchymal differentiation leading to  
229 fibrosis (Usunier et al., 2021), but it remains poorly understood how epithelial injury causes  
230 fibroblasts to promote fibrogenic activity. Our observations of altered fibroblast patterning in  
231 response to Reg4-ablation suggest that this system may be similar to other gut injury models in  
232 some respects. However, our data indicate that the Reg4-ablation is more of a “reductionist”  
233 model for epithelium-mediated colonic fibroblast activation, as the activation happens in absence  
234 of an inflammatory response. This model may aid in resolving less-understood mechanisms of  
235 fibroblast activation, compared to general injury models which have acute inflammation  
236 associated with them. Similar phenotypes are observed in colitis models, where extensive fibrosis  
237 is observed (Gregorio et al., 2017). These forms of fibrosis are linked to chronic bowel diseases  
238 (Specia, 2012), so a better understanding of the mechanisms through which fibroblast activation

239 occurs may elucidate underlying pathways and help to develop strategies to mitigate fibrotic  
240 formation.

241 There are numerous cell signaling changes after Reg4-ablation. With regard to Wnt signaling, we  
242 observe fluctuations in active  $\beta$ -catenin after Reg4-ablation. As  $\beta$ -catenin is a structural protein,  
243 adherens junction remodeling that happens after Reg4-ablation may play a part in this  
244 phenomenon (Grainger & Willert, 2018). If it is an indicator of Wnt signaling perturbation, this  
245 change would likely come from surrounding fibroblasts that supply Wnt ligands (David et al.,  
246 2020), since epithelial cells do not express Wnt signaling ligands in the colon (Sasaki et al., 2016).  
247 Indeed, the changes we observe in  $\beta$ -catenin activation may be driven in part by the shift we  
248 detect in the fibroblasts after ablation. We observe Pdgfra-high fibroblasts shift to the crypt-base  
249 in response to Reg4-ablation, and these cells have previously been shown to express  
250 noncanonical Wnts and Bmp ligands (David et al., 2020). This shift in signaling would have a  
251 profound effect on epithelial cells if the shifted crypt base fibroblasts have similar expression to  
252 Pdgfra-high fibroblasts in homeostasis. Whether this shift in these mesenchymal cells directly  
253 causes the proliferative changes seen in the epithelial cells, represents a critical avenue for future  
254 research. To our knowledge, this is the first example of discrete, directed changes in the epithelial  
255 cell population causing a shift in mesenchymal cell localization. It will be important to define the  
256 mechanism for the translocation of these cells in future studies.

257 With respect to Notch signaling, we observe that Reg4-ablation induces a significant increase in  
258 Notch1 in the form of both NTM and NICD. Treatment with the  $\gamma$ -secretase inhibitor, DBZ, is  
259 sufficient to mitigate this increased Notch1 activation, suggesting that the increased Notch  
260 activation we see in Reg4-ablation is mediated through a canonical pathway. It remains unclear  
261 as to which process mediates this activation in spite of the loss of the majority of colon-specific  
262 Notch ligands, especially as we observe a paradoxical increase in activated Notch1. We noted a  
263 precipitous decline in body weight of Reg4-ablated mice treated with DBZ, suggesting that there

264 are systemic redundancies between Reg4-expressing cells and Notch signaling within the mouse,  
 265 although the colonic mucosa remains competent for proliferation. Within the colon, there was one  
 266 notable change with respect to the localization of proliferation along the crypt axis. Normally the  
 267 crypt base is the site of peak proliferation, as seen in homeostasis and Reg4-ablation. However,  
 268 Notch-inhibited Reg4-ablated crypts have proliferation at the mid-crypt region and this may  
 269 implicate Notch signaling as a component of crypt axis regulation. In summary, our data  
 270 demonstrate the Reg4-ablation model as a novel model for the exploration of epithelial-  
 271 mesenchymal signaling and Notch dysregulation.

## 272 **Materials and Methods**

### 273 **Key Resources Table**

| Reagent type (species) or resource      | Designation                                                                            | Source or reference       | Identifiers                            | Additional information      |
|-----------------------------------------|----------------------------------------------------------------------------------------|---------------------------|----------------------------------------|-----------------------------|
| genetic reagent ( <i>Mus musculus</i> ) | <i>C57BL/6J</i>                                                                        | The Jackson Laboratory    | Cat# JAX: 000664, RRID:IMSR_JAX:000664 |                             |
| genetic reagent ( <i>Mus musculus</i> ) | <i>Reg4<sup>tm1(HBEGF/DsRed)C<sup>le</sup>/J</sup></i> , <i>Reg4<sup>DTR-Red</sup></i> | The Jackson Laboratory    | Cat# JAX: 029705, RRID:IMSR_JAX:029705 |                             |
| antibody                                | Rat monoclonal anti-Ki67                                                               | Thermo Fisher Scientific  | Cat# 14-5698-82, RRID:AB_10854564      | IHC-F (1:100)               |
| antibody                                | Goat polyclonal anti-Lrig1                                                             | R&D Systems               | Cat# AF3688, RRID:AB_2138836           | WB (1:1000)* IHC-F (1:500)‡ |
| antibody                                | Rabbit polyclonal anti-EGFR (phosphoY1068) antibody                                    | Abcam                     | Cat# ab5644, RRID:AB_305012            | WB (1:2000)*                |
| antibody                                | Rabbit monoclonal anti-EGFR                                                            | Abcam                     | Cat# ab52894, RRID:AB_869579           | WB (1:2000)†                |
| antibody                                | Rabbit polyclonal anti-ERK1/2                                                          | Bioss                     | Cat# bs-0022R, RRID:AB_10855763        | WB (1:2000)*                |
| antibody                                | Rabbit monoclonal anti-ERK1/2 (phospho p44/42)                                         | Cell Signaling Technology | Cat# 4370, RRID:AB_2315112             | WB (1:2000)†                |
| antibody                                | Rat monoclonal anti-F4/80                                                              | eBioscience               | Cat# 14-4801-85                        | IHC-F (1:500)‡              |
| antibody                                | Mouse anti-Smooth Muscle Actin ( $\alpha$ -SMA)                                        | Agilent                   | Cat# M0851, RRID:AB_2223500            | WB (1:1000)* IHC-F (1:500)‡ |
| antibody                                | Rabbit monoclonal anti-non-phospho (Active) $\beta$ -Catenin (Ser45)                   | Cell Signaling Technology | Cat# 19807, RRID:AB_2650576            | WB (1:2000)†                |
| antibody                                | Rabbit monoclonal anti-Notch1                                                          | Cell Signaling Technology | Cat# 3608, RRID:AB_2153354             | WB (1:1000)* IHC-F (1:400)‡ |
| antibody                                | Rabbit monoclonal anti-Cleaved Notch1 (Val1744)                                        | Cell Signaling Technology | Cat# 4147, RRID:AB_2153348             | WB (1:1000)†                |



|                         |                                                          |                           |                              |                                                             |
|-------------------------|----------------------------------------------------------|---------------------------|------------------------------|-------------------------------------------------------------|
| antibody                | Rabbit monoclonal anti-GAPDH                             | Cell Signaling Technology | Cat# 2118, RRID:AB_561053    | WB (1:10000)*                                               |
| antibody                | Sheep polyclonal anti-Dll1                               | R&D Systems               | Cat# AF5026, RRID:AB_2092830 | IHC-F (1:250)‡                                              |
| antibody                | Goat polyclonal anti-Dll4                                | R&D Systems               | Cat# AF1389, RRID:AB_354770  | IHC-F (1:400)§                                              |
| antibody                | Rabbit monoclonal anti-cMyc                              | Cell Signaling Technology | Cat# 5605, RRID:AB_1903938   | IHC-F (1:500)‡                                              |
| sequence-based reagent  | RNAscope® Probe- Mm-Lgr5                                 | Advanced Cell Diagnostics | Cat# 312171                  |                                                             |
| sequence-based reagent  | <i>Actin</i> qRT-PCR primers                             | This paper                |                              | (fp) TACCACCATGTACCCAGGCA;<br>(rp) CTCAGGAGGAGCAATGATCTTGAT |
| sequence-based reagent  | <i>Lrig1</i> qRT-PCR primers                             | This paper                |                              | (fp) CACAGTGGCTCTGCTGTATG;<br>(rp) CAGTCCCACTGTAAGGATGG     |
| sequence-based reagent  | <i>Lgr5</i> qRT-PCR primers                              | This paper                |                              | (fp) GGAAGCGCTACAGAATTTGA;<br>(rp) AGGCGTAGTCTGCTATGTGG     |
| sequence-based reagent  | <i>Egfr</i> qRT-PCR primers                              | This paper                |                              | (fp) GTGATGGGGATGTGATCATT;<br>(rp) AGCATAAAGGATTGCAGACG     |
| sequence-based reagent  | <i>Hes1</i> qRT-PCR primers                              | PrimerBank                | PrimerBank ID: 6680205a1     | (fp) CCAGCCAGTGTC AACACGA;<br>(rp) AATGCCGGGAGCTATCTTCT     |
| sequence-based reagent  | <i>Dll1</i> qRT-PCR primers                              | PrimerBank                | PrimerBank ID: 6681197a1     | (fp) CAGGACCTTCTTTGCGGTATG;<br>(rp) ACTGCCGCTATTCTTGTC      |
| sequence-based reagent  | <i>Dll4</i> qRT-PCR primers                              | PrimerBank                | PrimerBank ID: 9506547a1     | (fp) TTCCAGGCAACCTTCTCCGA;<br>(rp) ACTGCCGCTATTCTTGTC       |
| sequence-based reagent  | <i>Spdef2/3</i> qRT-PCR primers                          | This paper                |                              | (fp) TTGGATGAGCACTCGCTAGA;<br>(rp) AGCCGGTACTGGTGTCTGT      |
| sequence-based reagent  | <i>Muc2</i> qRT-PCR primers                              | This paper                |                              | (fp) GGTCCAGGGTCTGGATCACA;<br>(rp) GCTCAGCTCACTGCCATCTG     |
| commercial assay or kit | Pierce™ BCA Protein Assay Kit                            | Thermo Fisher Scientific  | Cat# 23227                   |                                                             |
| commercial assay or kit | PVDF Transfer Membrane, 0.45 μm                          | Thermo Fisher Scientific  | Cat# 88518                   |                                                             |
| commercial assay or kit | RNeasy Plus Mini Kit                                     | Qiagen                    | Cat# 74134                   |                                                             |
| commercial assay or kit | Maxima H Minus First Strand cDNA Synthesis Kit           | Thermo Fisher Scientific  | Cat# K1651                   |                                                             |
| commercial assay or kit | PowerUp SYBR Green Master Mix                            | Applied Biosystems        | Cat# A25742                  |                                                             |
| commercial assay or kit | RNAscope® Multiplex Fluorescent Reagent Kit v2           | Advanced Cell Diagnostics | Cat# 323100                  |                                                             |
| chemical compound, drug | Diphtheria Toxin from <i>Corynebacterium diphtheriae</i> | Millipore Sigma           | Cat# D0564                   |                                                             |

|                         |                                                                                                                 |                                                                                   |                                  |                                                                                                  |
|-------------------------|-----------------------------------------------------------------------------------------------------------------|-----------------------------------------------------------------------------------|----------------------------------|--------------------------------------------------------------------------------------------------|
| chemical compound, drug | Pierce® RIPA buffer                                                                                             | Thermo Fisher Scientific                                                          | Cat# 89900                       |                                                                                                  |
| chemical compound, drug | Pierce™ Protease Inhibitor Mini Tablets, EDTA-free                                                              | Thermo Fisher Scientific                                                          | Cat# A32955                      |                                                                                                  |
| chemical compound, drug | PhosSTOP™                                                                                                       | Roche                                                                             | Cat# 4906845001                  |                                                                                                  |
| chemical compound, drug | γ-Secretase Inhibitor XX Dibenzazepine; DBZ                                                                     | BioVision                                                                         | Cat# 2649, CAS# 209984-56-5      |                                                                                                  |
| chemical compound, drug | 5-Ethynyl-2'-deoxyuridine; EdU                                                                                  | Sigma Aldrich                                                                     | Cat# 900584                      |                                                                                                  |
| chemical compound, drug | Dextran Sulfate Sodium                                                                                          | Sigma Aldrich                                                                     | Cat# D8906                       |                                                                                                  |
| chemical compound, drug | Blocking Buffer, 5% Nonfat dry milk, 0.1% Tween-20, Tris-Buffered Saline                                        | This paper                                                                        |                                  | * Use as blocking buffer/antibody diluent indicated for selected antibody applications           |
| chemical compound, drug | Blocking Buffer, 5% Bovine Serum Albumen, 0.3% Triton X-100, 1mM CaCl <sub>2</sub> in Phosphate-Buffered Saline | This paper                                                                        |                                  | ‡ Use as blocking buffer/antibody diluent indicated for selected antibody applications           |
| chemical compound, drug | Blocking Buffer, 5% Bovine Serum Albumen, 0.1% Tween-20, Tris-Buffered Saline                                   | This paper                                                                        |                                  | † Use as blocking buffer/antibody diluent indicated for selected antibody applications           |
| chemical compound, drug | Dako Antibody Diluent, Background Reducing                                                                      | Agilent                                                                           | Cat# S302283-2                   | § Use as antibody diluent indicated for selected antibody applications                           |
| chemical compound, drug | Dako Protein Block, Serum-Free                                                                                  | Agilent                                                                           | Cat# X090930-2                   | § Use as blocking buffer indicated for selected antibody applications                            |
| chemical compound, drug | DAPI                                                                                                            | VWR                                                                               | Cat# 89139-054                   | 1 µg/mL PBS                                                                                      |
| software, algorithm     | Fiji/ImageJ                                                                                                     | PMID: 22743772                                                                    | RRID:SCR_002285                  |                                                                                                  |
| software, algorithm     | CryptCount                                                                                                      | <a href="https://github.com/twheele3/cproc">https://github.com/twheele3/cproc</a> |                                  | An R package that translates user-made image annotations of crypts to processable count formats. |
| software, algorithm     | R; RStudio                                                                                                      | R Project for Statistical Computing; RStudio                                      | RRID:SCR_001905; RRID:SCR_000432 |                                                                                                  |
| software, algorithm     | Image Studio Lite                                                                                               | LI-COR                                                                            | RRID:SCR_013715                  |                                                                                                  |
| software, algorithm     | Zen                                                                                                             | Zeiss                                                                             | RRID:SCR_013672                  |                                                                                                  |
| software, algorithm     | NIS-Elements                                                                                                    | Nikon                                                                             | RRID:SCR_014329                  |                                                                                                  |

274

275 **Mice.** C57BL/6 (Jackson Laboratory (Jax), Bar Harbor, ME, USA) and Reg4-dsRed-DTR (Jax)

276 mice were housed in a specific pathogen-free environment under strictly controlled light cycle

277 conditions, fed a standard rodent lab chow and provided water ad libitum. Mice were sacrificed at  
278 8-10 weeks of age by direct cervical dislocation. **Reg4-ablation.** Reg4-dsRed-DTR mice were  
279 administered Diphtheria toxin (CalBiochem, Billerica, MA, USA) at 50µg/kg body weight in 0.2mL  
280 PBS vehicle daily via intraperitoneal (IP) injection for 1-6 days of treatment, and were sacrificed  
281 24 hours after last injection. Reg4-dsRed-DTR or C57BL/6 mice were administered 0.2mL PBS  
282 vehicle by IP injection for 4 days as a control group. **Notch inhibition.** Mice were administered  
283 γ-Secretase Inhibitor XX Dibenazepine (DBZ) (BioVision #2649) at 10µmol/kg body weight  
284 (vehicle 0.5% (w/v) hydroxypropylmethyl cellulose, 0.1% (v/v) Tween-80, ddH<sub>2</sub>O) daily by IP  
285 injection for two days prior to sacrifice. **5-ethynyl-2'-deoxyuridine (EdU) tracing.** Mice were  
286 treated with 2mg EdU (Sigma-Aldrich, St. Louis, MO, USA) in 0.2mL DMSO/PBS vehicle by IP  
287 injection 2 hours prior to sacrifice. **Treatment with dextran sodium sulfate (DSS).** DSS (Sigma-  
288 Aldrich) was dissolved in filtered drinking water and supplied ad libitum to C57Bl/6 mice for 7  
289 days. Drinking water was switched to normal water on Day 8, then mice were sacrificed on Day  
290 11 and colons were dissected for histology. All procedures were approved and performed in  
291 accordance with the policies of the University of Oregon Institutional Animal Care and Use  
292 Committee.

293 **Histology.** Colons dissected from mice were flushed with ice-cold PBS, flayed, and pinned flat,  
294 then fixed in 4% PFA/PBS for 60 minutes at room temperature with light oscillation. Fixed colons  
295 were washed 3x5 minutes in PBS and incubated in 30% sucrose overnight at 4°C, then blocked  
296 in OCT. 15 µm sections were taken on Superfrost™ Plus Slides (Fisher, Pittsburgh, PA, USA).

297 **Immunohistochemistry.** Slides were washed 3x3 minutes in PBS and blocked for 1 hour at room  
298 temperature in blocking buffer, then overnight at 4°C with primary antibody diluted in staining  
299 buffer. Slides were washed 3x3 minutes in PBS then stained with secondary antibody diluted in  
300 blocking butter. Slides were washed 3x3 minutes in PBS, counterstained with DAPI, and mounted  
301 with N-propyl gallate mounting medium. Slides were imaged via confocal microscopy using a

302 Zeiss LSM-880 (Zeiss, Oberkochen, Germany) system for morphimetry, or a Nikon Eclipse/Ds-  
303 Ri2 (Nikon, Tokyo, Japan) for mean intensity analysis. ***In-situ hybridization.*** Sections were  
304 labeled for *Lgr5* using RNAscope® Probe- Mm-Lgr5 (Advanced Cell Diagnostics (ACD), Newark,  
305 CA, USA) using RNAscope® Multiplex Fluorescent Reagent Kit v2 (ACD) as per manufacturer  
306 recommended protocol for fixed frozen sample (ACD TN 320535 Rev A, 323100-USM). In brief,  
307 slides were washed briefly in 1xPBS then boiled for 5 minutes in 1x Target Retrieval buffer,  
308 followed by two brief washes in ddH<sub>2</sub>O then once in 95% EtOH. Slides were dried then dammed  
309 with an ImmEdge hydrophobic barrier pen, then incubated with Protease III for 15 minutes at  
310 40°C. Slides were washed briefly in ddH<sub>2</sub>O, then incubated at 40°C in sequence with Probe-Mm-  
311 *Lgr5* (2 hours), AMP 1 (30 minutes), AMP 2 (30 minutes), AMP 3 (15 minutes), HRP-C1 (15  
312 minutes), Opal-650 (1:2000 in TSA buffer) (30 minutes), with 2x2 minute washes with 1x Wash  
313 Buffer between hybridization steps. Slides were counterstained with DAPI and mounted with N-  
314 propyl gallate mounting medium. Slides were imaged via confocal microscopy using a Zeiss LSM-  
315 880 system.

316 **Mucosal Tissue Isolation.** Samples of isolated mucosal tissue were prepared from mice treated  
317 with either DT or vehicle daily for 3 days. The distal half of the colon was dissected out, flushed,  
318 flayed, and cut into 1-cm pieces and placed in 1 mM EDTA/5 mM DTT/PBS to incubate for 40  
319 minutes on ice with gentle oscillation. Supernatant was decanted and replaced with 30mM  
320 EDTA/PBS, and the samples were incubated for 8 minutes at 37C with gentle agitation every 2  
321 minutes. Supernatant was decanted and replaced with ice-cold PBS, and mucosal tissue was  
322 dissociated from muscle tissue by hand agitation (shaking at approx. 120 beats per minute for 1  
323 minute intervals) until there were no apparent changes in turbidity. Visible muscle tissue was  
324 removed and dissociated mucosal tissue was pelleted at 1000xRCF at 4°C.

325 **Western Blot.** Isolated mucosal tissue was digested with 300uL Pierce® RIPA buffer  
326 (ThermoFisher, Waltham, MA, USA) treated with Pierce™ Protease Inhibitor Mini Tablets, EDTA-

327 free (Thermo) and PhosSTOP™ (Roche, Basel, Switzerland) by syringing repeatedly through a  
328 22-ga needle. Suspension was then centrifuged at for 5 minutes at 5000xRCF, then 5 minutes at  
329 14000xRCF to clarify supernatant. Protein content was measured by BCA assay (ThermoFisher)  
330 to load 25µg of protein per western blot lane. Western blots were run with freshly prepared 10%  
331 acrylamide gels at 125 V and transferred to 0.45µm-pore PVDF membranes (ThermoFisher) at  
332 55 V for 18 hours on ice. Membranes were dried, washed briefly with TBST, then blocked with  
333 specified blocking buffer for 1hr RT and incubated overnight with primary antibody diluted in  
334 blocking buffer at 4°C with light oscillation. Membranes were washed 3x3 minutes in TBST, then  
335 incubated for 1 hour in HRP-conjugated secondary antibody diluted in blocking buffer.  
336 Membranes were washed 3x3 minutes in TBST, then incubated for 5 minutes with Cytiva  
337 Amersham™ ECL™ Prime Western Blotting Detection Reagent (Cytiva, Marlsborough, MA, USA)  
338 prior to imaging for chemifluorescence on a LI-COR Odyssey Fc Imaging System (LI-COR,  
339 Lincoln, NE, USA). Membranes were stripped and restained up to 3 times, washing 2x10 minutes  
340 with mild stripping buffer (1.5% glycine, 0.1% SDS, 1% Tween-20, pH 2.2 in PBS), then 2x10  
341 minutes with PBS and 2x5 minutes with TBST before re-blocking. Antibody and blocking  
342 conditions are described in Key Resources Table. Protein fold change was calculated versus  
343 vehicle by batch correcting based on vehicle response between membranes, normalizing to  
344 GAPDH expression as a loading control, then normalizing to vehicle mean.

345 **qRT-PCR.** Total RNA was isolated from mucosal tissue pellets using RNeasy Plus Mini Kit  
346 (Qiagen, Hilden, Germany). First strand cDNA was synthesized using 2 µg of total RNA using  
347 Maxima H Minus Kit according to manufacturer instructions (ThermoFisher). qRT-PCR was  
348 performed using PowerUp SYBR Green Master Mix (Applied Biosystems, Waltham, MA, USA)  
349 according to the manufacturer's recommendations, and run using a Bio-Rad CFX96 Real-Time  
350 System (Bio-Rad, Hercules, CA, USA). Each target was run with three technical replicates per



351 sample. The relative target gene mRNA levels were normalized to actin expression. Primers used  
352 are listed in Key Resources Table.

353 **Statistical analysis.** Statistical analysis was performed using R. Morphometric data of blinded  
354 fluorescent images were hand annotated for crypts in Fiji (Schindelin et al., 2012) and processed  
355 in R for crypt structure using lab-produced software CryptCount  
356 (<https://github.com/twheelee3/ccproc>). **Biological replicates** consisted of individual mice per  
357 treatment condition (n = 2-5 for immunofluorescence and *in situ* hybridization, 5-8 for WB and  
358 qRT-PCR). 15-30 well-formed crypts (visible in cross-section from muscularis mucosa to lumen)  
359 were counted per marker per mouse, and tested by Tukey test using crypts as random effect. WB  
360 and qRT-PCR were analyzed by unpaired two-tailed Student's t-test.

### 361 **Abbreviations**

362  $\alpha$ SMA – alpha Smooth Muscle Actin  
363 DBZ -  $\gamma$ -Secretase Inhibitor XX Dibenzazepine  
364 DSS – dextran sodium sulfate  
365 DT – diphtheria toxin  
366 DTR – diphtheria toxin receptor  
367 DTT - dithiothreitol  
368 EDTA - ethylenediaminetetraacetic acid  
369 EdU – 5-ethynyl-2'-deoxyuridine  
370 FISH – fluorescence in situ hybridization  
371 IEC – intestinal epithelial cell  
372 NICD – Notch1 intracellular domain  
373 NTM – Notch1 transmembrane domain  
374 OCT – Optimal Cutting Temperature compound  
375 PBS - phosphate-buffered saline solution  
376 PFA - paraformaldehyde  
377 qRT-PCR – quantitative real-time PCR  
378 RT - room temperature  
379 TBST - Tris-buffered saline with 0.1% Tween-20  
380 Veh – vehicle

### 382 **References**

383 Barker, N., van Es, J. H., Kuipers, J., Kujala, P., van den Born, M., Cozijnsen, M., Haegebarth,  
384 A., Korving, J., Begthel, H., Peters, P. J., & Clevers, H. (2007). Identification of stem cells  
385 in small intestine and colon by marker gene Lgr5. *Nature*, 449(7165), 1003–1007.  
386 <https://doi.org/10.1038/nature06196>

- 387 Bohin, N., Keeley, T. M., Carulli, A. J., Walker, E. M., Carlson, E. A., Gao, J., Aifantis, I., Siebel,  
388 C. W., Rajala, M. W., Myers, M. G., Jones, J. C., Brindley, C. D., Dempsey, P. J., &  
389 Samuelson, L. C. (2020). Rapid Crypt Cell Remodeling Regenerates the Intestinal Stem  
390 Cell Niche after Notch Inhibition. *Stem Cell Reports*, 15(1), 156–170.  
391 <https://doi.org/10.1016/j.stemcr.2020.05.010>
- 392 Castillo-Azofeifa, D., Fazio, E. N., Nattiv, R., Good, H. J., Wald, T., Pest, M. A., Sauvage, F. J.,  
393 Klein, O. D., & Asfaha, S. (2019). Atoh1 + secretory progenitors possess renewal capacity  
394 independent of Lgr5 + cells during colonic regeneration. *The EMBO Journal*, 38(4).  
395 <https://doi.org/10.15252/embj.201899984>
- 396 Chacón-Martínez, C. A., Koester, J., & Wickström, S. A. (2018). Signaling in the stem cell niche:  
397 regulating cell fate, function and plasticity. *Development*, 145(15).  
398 <https://doi.org/10.1242/dev.165399>
- 399 Chen, L., Deng, H., Cui, H., Fang, J., Zuo, Z., Deng, J., Li, Y., Wang, X., & Zhao, L. (2018).  
400 Inflammatory responses and inflammation-associated diseases in organs. *Oncotarget*,  
401 9(6), 7204–7218. <https://doi.org/10.18632/oncotarget.23208>
- 402 David, M. B., Valenta, T., Fazilaty, H., Hausmann, G., & Basler, K. (2020). Distinct populations  
403 of crypt-associated fibroblasts act as signaling hubs to control colon homeostasis. *PLoS*  
404 *Biology*, 18(12). <https://doi.org/10.1371/journal.pbio.3001032>
- 405 Davies, P. S., Powell, A. E., Swain, J. R., & Wong, M. H. (2009). Inflammation and Proliferation  
406 Act Together to Mediate Intestinal Cell Fusion. *PLoS ONE*, 4(8), e6530.  
407 <https://doi.org/10.1371/journal.pone.0006530>
- 408 Degirmenci, B., Valenta, T., Dimitrieva, S., Hausmann, G., & Basler, K. (2018). GLI1-expressing  
409 mesenchymal cells form the essential Wnt-secreting niche for colon stem cells. *Nature*,  
410 558(7710), 449–453. <https://doi.org/10.1038/s41586-018-0190-3>
- 411 Droy-Dupré, L., Vallée, M., Bossard, C., Labois, C. L., & Jarry, A. (2012). A multiparametric  
412 approach to monitor the effects of  $\gamma$ -secretase inhibition along the whole intestinal tract.  
413 *Disease Models & Mechanisms*, 5(1), 107–114. <https://doi.org/10.1242/dmm.007591>
- 414 Dubé, P. E., Liu, C. Y., Girish, N., Washington, M. K., & Polk, D. B. (2018). Pharmacological  
415 activation of epidermal growth factor receptor signaling inhibits colitis-associated cancer in  
416 mice. *Scientific Reports*, 8(1), 9119. <https://doi.org/10.1038/s41598-018-27353-w>
- 417 Grainger, S., & Willert, K. (2018). Mechanisms of Wnt signaling and control. *Wiley*  
418 *Interdisciplinary Reviews: Systems Biology and Medicine*, 10(5), e1422.  
419 <https://doi.org/10.1002/wsbm.1422>
- 420 Gregorio, J. Di, Sferra, R., Specca, S., Vetusch, A., Dubuquoy, C., Desreumaux, P., Pompili, S.,  
421 Cristiano, L., Gaudio, E., Flati, V., & Latella, G. (2017). Role of glycogen synthase kinase-  
422  $3\beta$  and PPAR- $\gamma$  on epithelial-to-mesenchymal transition in DSS-induced colorectal fibrosis.  
423 *PLoS ONE*, 12(2). <https://doi.org/10.1371/JOURNAL.PONE.0171093>
- 424 Jones, G.-R., Bain, C. C., Fenton, T. M., Kelly, A., Brown, S. L., Ivens, A. C., Travis, M. A.,  
425 Cook, P. C., & MacDonald, A. S. (2018). Dynamics of Colon Monocyte and Macrophage  
426 Activation During Colitis. *Frontiers in Immunology*, 9.  
427 <https://doi.org/10.3389/fimmu.2018.02764>
- 428 Kiesler, P., Fuss, I. J., & Strober, W. (2015). Experimental Models of Inflammatory Bowel  
429 Diseases. *Cellular and Molecular Gastroenterology and Hepatology*, 1(2), 154–170.

- 430 <https://doi.org/10.1016/j.jcmgh.2015.01.006>
- 431 Liang, S., Li, X., & Wang, X. (2019). Notch Signaling in Mammalian Intestinal Stem Cells:  
432 Determining Cell Fate and Maintaining Homeostasis. *Current Stem Cell Research &*  
433 *Therapy*, 14(7), 583–590. <https://doi.org/10.2174/1574888X14666190429143734>
- 434 Meran, L., Baulies, A., & Li, V. S. W. (2017). Intestinal Stem Cell Niche: The Extracellular Matrix  
435 and Cellular Components. *Stem Cells International*, 2017, 1–11.  
436 <https://doi.org/10.1155/2017/7970385>
- 437 Mizoguchi, E., Low, D., Ezaki, Y., & Okada, T. (2020). Recent updates on the basic  
438 mechanisms and pathogenesis of inflammatory bowel diseases in experimental animal  
439 models. *Intestinal Research*, 18(2), 151–167. <https://doi.org/10.5217/ir.2019.09154>
- 440 Novak, S., Drenjancevic, I., Vukovic, R., Kellermayer, Z., Cosic, A., Tolusic Levak, M., Balogh,  
441 P., Culo, F., & Mihalj, M. (2016). Anti-Inflammatory Effects of Hyperbaric Oxygenation  
442 during DSS-Induced Colitis in BALB/c Mice Include Changes in Gene Expression of *HIF-1*  
443  $\alpha$ , Proinflammatory Cytokines, and Antioxidative Enzymes. *Mediators of Inflammation*,  
444 2016, 1–19. <https://doi.org/10.1155/2016/7141430>
- 445 Nusse, R., & Clevers, H. (2017). Wnt/ $\beta$ -Catenin Signaling, Disease, and Emerging Therapeutic  
446 Modalities. *Cell*, 169(6), 985–999. <https://doi.org/10.1016/j.cell.2017.05.016>
- 447 Pellegrinet, L., Rodilla, V., Liu, Z., Chen, S., Koch, U., Espinosa, L., Kaestner, K. H., Kopan, R.,  
448 Lewis, J., & Radtke, F. (2011). Dll1- and Dll4-mediated notch signaling are required for  
449 homeostasis of intestinal stem cells. *Gastroenterology*, 140(4), 1230-1240.e7.  
450 <https://doi.org/10.1053/j.gastro.2011.01.005>
- 451 Potten, C. S. (1998). Stem cells in gastrointestinal epithelium: numbers, characteristics and  
452 death. *Philosophical Transactions of the Royal Society of London. Series B: Biological*  
453 *Sciences*, 353(1370), 821–830. <https://doi.org/10.1098/rstb.1998.0246>
- 454 Powell, A. E., Wang, Y., Li, Y., Poulin, E. J., Means, A. L., Washington, M. K., Higginbotham, J.  
455 N., Juchheim, A., Prasad, N., Levy, S. E., Guo, Y., Shyr, Y., Aronow, B. J., Haigis, K. M.,  
456 Franklin, J. L., & Coffey, R. J. (2012). The Pan-ErbB Negative Regulator Lrig1 Is an  
457 Intestinal Stem Cell Marker that Functions as a Tumor Suppressor. *Cell*, 149(1), 146–158.  
458 <https://doi.org/10.1016/j.cell.2012.02.042>
- 459 Qin, T., Yang, J., Huang, D., Zhang, Z., Huang, Y., Chen, H., & Xu, G. (2021). DOCK4  
460 stimulates MUC2 production through its effect on goblet cell differentiation. *Journal of*  
461 *Cellular Physiology*, 236(9), 6507–6519. <https://doi.org/10.1002/jcp.30325>
- 462 Sasaki, N., Sachs, N., Wiebrands, K., Ellenbroek, S. I. J., Fumagalli, A., Lyubimova, A., Begthel,  
463 H., van den Born, M., van Es, J. H., Karthaus, W. R., Li, V. S. W., López-Iglesias, C.,  
464 Peters, P. J., van Rheenen, J., van Oudenaarden, A., & Clevers, H. (2016). Reg4 + deep  
465 crypt secretory cells function as epithelial niche for Lgr5 + stem cells in colon. *Proceedings*  
466 *of the National Academy of Sciences*, 113(37), E5399–E5407.  
467 <https://doi.org/10.1073/pnas.1607327113>
- 468 Schindelin, J., Arganda-Carreras, I., Frise, E., Kaynig, V., Longair, M., Pietzsch, T., Preibisch,  
469 S., Rueden, C., Saalfeld, S., Schmid, B., Tinevez, J.-Y., White, D. J., Hartenstein, V.,  
470 Eliceiri, K., Tomancak, P., & Cardona, A. (2012). Fiji: an open-source platform for  
471 biological-image analysis. *Nature Methods*, 9(7), 676–682.  
472 <https://doi.org/10.1038/nmeth.2019>

- 473 Shinoda, M., Shin-Ya, M., Naito, Y., Kishida, T., Ito, R., Suzuki, N., Yasuda, H., Sakagami, J.,  
474 Imanishi, J., Kataoka, K., Mazda, O., & Yoshikawa, T. (2010). Early-stage blocking of  
475 Notch signaling inhibits the depletion of goblet cells in dextran sodium sulfate-induced  
476 colitis in mice. *Journal of Gastroenterology*, 45(6), 608–617.  
477 <https://doi.org/10.1007/s00535-010-0210-z>
- 478 Specia, S. (2012). Cellular and molecular mechanisms of intestinal fibrosis. *World Journal of*  
479 *Gastroenterology*, 18(28), 3635. <https://doi.org/10.3748/wjg.v18.i28.3635>
- 480 Stzepourginski, I., Nigro, G., Jacob, J.-M., Dulauroy, S., Sansonetti, P. J., Eberl, G., & Peduto,  
481 L. (2017). CD34 + mesenchymal cells are a major component of the intestinal stem cells  
482 niche at homeostasis and after injury. *Proceedings of the National Academy of Sciences*,  
483 114(4), E506–E513. <https://doi.org/10.1073/pnas.1620059114>
- 484 Sun, Z.-J., Zhang, Y.-Z., Liu, F., Chen, J.-J., Chen, D.-X., Liu, H.-B., Liang, L., & Han, H. (2018).  
485 A fusion protein composed of the DSL domain of Dll1 and RGD motif protects cryptic stem  
486 cells in irradiation injury. *Bioscience Reports*, 38(2). <https://doi.org/10.1042/BSR20171255>
- 487 Tian, H., Biehs, B., Warming, S., Leong, K. G., Rangell, L., Klein, O. D., & de Sauvage, F. J.  
488 (2011). A reserve stem cell population in small intestine renders Lgr5-positive cells  
489 dispensable. *Nature*, 478(7368), 255–259. <https://doi.org/10.1038/nature10408>
- 490 Usunier, B., Brossard, C., L’Homme, B., Linard, C., Benderitter, M., Milliat, F., & Chapel, A.  
491 (2021). HGF and TSG-6 Released by Mesenchymal Stem Cells Attenuate Colon  
492 Radiation-Induced Fibrosis. *International Journal of Molecular Sciences*, 22(4), 1790.  
493 <https://doi.org/10.3390/ijms22041790>
- 494 van Es, J. H., Wiebrands, K., López-Iglesias, C., van de Wetering, M., Zeinstra, L., van den  
495 Born, M., Korving, J., Sasaki, N., Peters, P. J., van Oudenaarden, A., & Clevers, H. (2019).  
496 Enteroendocrine and tuft cells support Lgr5 stem cells on Paneth cell depletion.  
497 *Proceedings of the National Academy of Sciences*, 116(52), 26599–26605.  
498 <https://doi.org/10.1073/pnas.1801888117>
- 499 Wei, Q., & Frenette, P. S. (2018). Niches for Hematopoietic Stem Cells and Their Progeny.  
500 *Immunity*, 48(4), 632–648. <https://doi.org/10.1016/j.immuni.2018.03.024>
- 501 Zhang, Y., Dubé, P. E., Washington, M. K., Yan, F., & Polk, D. B. (2012). ErbB2 and ErbB3  
502 regulate recovery from dextran sulfate sodium-induced colitis by promoting mouse colon  
503 epithelial cell survival. *Laboratory Investigation*, 92(3), 437–450.  
504 <https://doi.org/10.1038/labinvest.2011.192>
- 505 Zhdanovskaya, N., Firrincieli, M., Lazzari, S., Pace, E., Scribani Rossi, P., Felli, M. P., Talora,  
506 C., Screpanti, I., & Palermo, R. (2021). Targeting Notch to Maximize Chemotherapeutic  
507 Benefits: Rationale, Advanced Strategies, and Future Perspectives. *Cancers*, 13(20), 5106.  
508 <https://doi.org/10.3390/cancers13205106>

509

## 510 **Author Contributions**

### 511 **Timothy W. Wheeler**

512 Contribution: Conceptualization, formal analysis, investigation, data curation, writing – original  
513 draft, visualization.

514 Competing interests: No competing interests declared.

515 <https://orcid.org/0000-0001-9518-4305>

516 **Anne E. Zemper**

517 Contribution: Conceptualization, resources, writing – review and editing, supervision, funding  
518 acquisition.

519 Competing interests: No competing interests declared.

520 <https://orcid.org/0000-0001-8238-1406>

521 **Acknowledgements**

522 We thank Breanne Mohr for assistance with mouse colony management and experimental work.  
523 We gratefully acknowledge the use of the University of Oregon Genomics & Cell Characterization  
524 Core imaging facilities.
